# Supplementary material for: The Macroeconomics of Food Insecurity and Food Price in Ethiopia: Bayesian VAR Analysis
Source: Preprints.org preprint supplement (doi:10.20944/preprints202201.0274.v1), 2022-01-19
Supplement: Supplementary file 1 [file supplementary]

## Sheet: food data
			finally used data
log(nsp) log(pf) log(aid) log(a) log(e) log(fsp) log(y) log(pnf) log(w) log(ip) pins 1988q1 2018q4 L1=0.35 m=1																log(nsp) log(pf) log(aid) log(a) log(e) log(fsp) log(y) log(pnf)
t	E	Aid	NSP	Pf	FSP	Pnf	Y	IP	A	W	Pins	RGDP
1988Q1	2.07	192566700	0.539	106.99	21000000	14.9871	3353.35	28.9315	2641	870	3	150672779000
1988Q2	2.07	173632275	0.53925	108.862	21000000	15.2616	3322.87	30.2512	2678.5	902.5	3	150536780175
1988Q3	2.07	154697850	0.5395	110.735	21000000	15.51	3292.39	31.5709	2716	935	3	150400781350
1988Q4	2.07	135763425	0.53975	112.608	21000000	15.7062	3261.91	32.8906	2753.5	967.5	3	150264782525
1989Q1	2.07	116829000	0.54	114.48	21000000	15.8241	3231.43	34.2103	2791	1000	3	150128783700
1989Q2	2.07	129402225	0.5425	117.127	21250000	15.8587	3225.37	34.4713	2818.38	1050	2.75	151152080925
1989Q3	2.07	141975450	0.545	119.775	21500000	15.8894	3219.3	34.7324	2845.75	1100	2.5	152175378150
1989Q4	2.07	154548675	0.5475	122.422	21750000	16.0169	3213.24	34.9934	2873.12	1150	2.25	153198675375
1990Q1	2.07	167121900	0.55	125.07	22000000	16.3418	3207.18	35.2545	2900.5	1200	2	154221972600
1990Q2	2.07	167613300	0.54	136.013	22500000	16.9308	3124.03	35.5679	2899.88	1112.5	1.75	151470082100
1990Q3	2.07	168104700	0.53	146.957	23000000	17.7152	3040.88	35.8814	2899.25	1025	1.5	148718191600
1990Q4	2.07	168596100	0.52	157.9	23500000	18.5926	2957.73	36.1949	2898.62	937.5	1.25	145966301100
1991Q1	2.07	169087500	0.51	168.844	24000000	19.4605	2874.57	36.5084	2898	850	1	143214410600
1991Q2	2.25325	177311700	0.505	173.593	24500000	20.2427	2789.04	37.0883	2876.75	887.5	2	140109350275
1991Q3	2.4365	185535900	0.5	178.342	25000000	20.9695	2703.5	37.6682	2855.5	925	3	137004289950
1991Q4	2.61975	193760100	0.495	183.091	25500000	21.6975	2617.96	38.2482	2834.25	962.5	4	133899229625
1992Q1	2.803	201984300	0.49	187.84	26000000	22.4831	2532.43	38.8281	2813	1000	5	130794169300
1992Q2	3.35225	187845750	0.48375	191.409	26750000	23.3543	2590.41	40.2463	2799.25	1125	5	135091684425
1992Q3	3.9015	173707200	0.4775	194.977	27500000	24.2235	2648.39	41.6645	2785.5	1250	5	139389199550
1992Q4	4.45075	159568650	0.47125	198.546	28250000	24.9744	2706.37	43.0827	2771.75	1375	5	143686714675
1993Q1	5	145430100	0.465	202.115	29000000	25.4907	2764.36	44.5009	2758	1500	5	147984229800
1993Q2	5.11625	159638850	0.464025	205.955	29250000	25.7084	2761.98	47.1996	2778.75	1362.5	4.75	149164390925
1993Q3	5.2325	173847600	0.46305	209.795	29500000	25.7734	2759.61	49.8983	2799.5	1225	4.5	150344552050
1993Q4	5.34875	188056350	0.462075	213.635	29750000	25.8838	2757.23	52.597	2820.25	1087.5	4.25	151524713175
1994Q1	5.465	202265100	0.4611	217.475	30000000	26.2378	2754.86	55.2956	2841	950	4	152704874300
1994Q2	5.63825	192620025	0.459575	223.564	30250000	26.9637	2773.1	57.6166	2828.75	1060	4.25	155044126450
1994Q3	5.8115	182974950	0.45805	229.653	30500000	27.9093	2791.34	59.9376	2816.5	1170	4.5	157383378600
1994Q4	5.98475	173329875	0.456525	235.741	30750000	28.8526	2809.58	62.2585	2804.25	1280	4.75	159722630750
1995Q1	6.158	163684800	0.455	241.83	31000000	29.5717	2827.82	64.5795	2792	1390	5	162061882900
1995Q2	6.2065	156555450	0.45375	232.623	31500000	29.905	2890.87	65.9216	2836.62	1275	4.75	167096405700
1995Q3	6.255	149426100	0.4525	223.415	32000000	29.9335	2953.93	67.2637	2881.25	1160	4.5	172130928500
1995Q4	6.3035	142296750	0.45125	214.208	32500000	29.7988	3016.98	68.6058	2925.88	1045	4.25	177165451300
1996Q1	6.352	135167400	0.45	205	33000000	29.6424	3080.04	69.9479	2970.5	930	4	182199974100
1996Q2	6.439	129379275	0.4505	208.792	33000000	29.5759	3080.45	70.4352	2982.62	922.5	4.25	183627468475
1996Q3	6.526	123591150	0.451	212.585	33000000	29.59	3080.86	70.9226	2994.75	915	4.5	185054962850
1996Q4	6.613	117803025	0.4515	216.377	33000000	29.6457	3081.27	71.41	3006.88	907.5	4.75	186482457225
1997Q1	6.7	112014900	0.452	220.17	33000000	29.7037	3081.68	71.8974	3019	900	5	187909951600
1997Q2	6.804	116453700	0.449	219.127	33500000	29.7323	3033.51	71.7447	3037.75	950	4.75	186285404700
1997Q3	6.908	120892500	0.446	218.085	34000000	29.7302	2985.34	71.592	3056.5	1000	4.5	184660857800
1997Q4	7.012	125331300	0.443	217.042	34500000	29.7037	2937.16	71.4393	3075.25	1050	4.25	183036310900
1998Q1	7.116	129770100	0.44	216	35000000	29.6591	2888.99	71.2866	3094	1100	4	181411764000
1998Q2	7.3225	124899975	0.4405	220.104	35250000	29.6165	2904.59	71.0445	3103.25	1050	4.25	183752948950
1998Q3	7.529	120029850	0.441	224.208	35500000	29.6522	2920.18	70.8024	3112.5	1000	4.5	186094133900
1998Q4	7.7355	115159725	0.4415	228.312	35750000	29.8561	2935.77	70.5603	3121.75	950	4.75	188435318850
1999Q1	7.942	110289600	0.442	232.416	36000000	30.3183	2951.37	70.3182	3131	900	5	190776503800
1999Q2	8.01075	113022675	0.4615	231.416	35000000	31.0763	2973.86	70.3633	3120.5	912.5	5	193673071800
1999Q3	8.0795	115755750	0.481	230.416	34000000	31.9574	2996.35	70.4083	3110	925	5	196569639800
1999Q4	8.14825	118488825	0.5005	229.416	33000000	32.7363	3018.85	70.4534	3099.5	937.5	5	199466207800
2000Q1	8.217	121221900	0.52	228.416	32000000	33.1878	3041.34	70.4985	3089	950	5	202362775800
2000Q2	8.277	122478075	0.5125	217.511	32750000	33.1501	3080.96	70.6254	3106.5	920	5	206562464275
2000Q3	8.337	123734250	0.505	206.606	33500000	32.7154	3120.57	70.7523	3124	890	5	210762152750
2000Q4	8.397	124990425	0.4975	195.701	34250000	32.0394	3160.19	70.8791	3141.5	860	5	214961841225
2001Q1	8.457	126246600	0.49	184.796	35000000	31.2778	3199.8	71.006	3159	830	5	219161529700
2001Q2	8.48475	135631125	0.48425	194.728	35750000	30.5808	3188.82	70.8699	3152.12	897.5	4.75	219991453700
2001Q3	8.5125	145015650	0.4785	204.661	36500000	30.0774	3177.84	70.7338	3145.25	965	4.5	220821377700
2001Q4	8.54025	154400175	0.47275	214.594	37250000	29.891	3166.87	70.5977	3138.38	1032.5	4.25	221651301700
2002Q1	8.568	163784700	0.467	224.526	38000000	30.1451	3155.89	70.4616	3131.5	1100	4	222481225700
2002Q2	8.576	202726125	0.46075	230.981	38500000	30.8998	3117.04	70.6667	3131.38	1125	4	221279070800
2002Q3	8.584	241667550	0.4545	237.436	39000000	31.9632	3078.2	70.8718	3131.25	1150	4	220076915900
2002Q4	8.592	280608975	0.44825	243.891	39500000	33.0797	3039.36	71.077	3131.12	1175	4	218874761000
2003Q1	8.6	319550400	0.442	250.346	40000000	33.994	3000.51	71.2821	3131	1200	4	217672606100
2003Q2	8.609	316576350	0.4365	254.977	40750000	34.5258	3078.59	71.9751	3196.75	1150	4	225058565850
2003Q3	8.618	313602300	0.431	259.608	41500000	34.7948	3156.66	72.6681	3262.5	1100	4	232444525600
2003Q4	8.627	310628250	0.4255	264.24	42250000	34.9958	3234.74	73.3611	3328.25	1050	4	239830485350
2004Q1	8.636	307654200	0.42	268.871	43000000	35.3236	3312.81	74.0541	3394	1000	4	247216445100
2004Q2	8.6435	321935175	0.41425	277.608	43750000	35.9262	3385.31	74.39	3373.62	987.5	3.25	254520928350
2004Q3	8.651	336216150	0.4085	286.346	44500000	36.7653	3457.82	74.7258	3353.25	975	2.5	261825411600
2004Q4	8.6585	350497125	0.40275	295.083	45250000	37.7556	3530.32	75.0616	3332.88	962.5	1.75	269129894850
2005Q1	8.666	364778100	0.397	303.82	46000000	38.812	3602.83	75.3975	3312.5	950	1	276434378100
2005Q2	8.67425	356028750	0.394	316.96	46500000	39.8697	3673.53	75.6738	3319.88	962.5	1.25	283922105700
2005Q3	8.6825	347279400	0.391	330.101	47000000	40.9451	3744.23	75.9502	3327.25	975	1.5	291409833300
2005Q4	8.69075	338530050	0.388	343.241	47500000	42.0749	3814.94	76.2265	3334.62	987.5	1.75	298897560900
2006Q1	8.699	329780700	0.385	356.381	48000000	43.2957	3885.64	76.5029	3342	1000	2	306385288500
2006Q2	8.76575	356031450	0.38175	387.475	48750000	44.6587	3968.19	77.4146	3359.25	1030	2.25	315160291075
2006Q3	8.8325	382282200	0.3785	418.569	49500000	46.2731	4050.74	78.3264	3376.5	1060	2.5	323935293650
2006Q4	8.89925	408532950	0.37525	449.663	50250000	48.2628	4133.29	79.2382	3393.75	1090	2.75	332710296225
2007Q1	8.966	434783700	0.372	480.757	51000000	50.7515	4215.85	80.1499	3411	1120	3	341485298800
2007Q2	9.1245	480812625	0.368	533.882	51750000	53.831	4298.89	81.3207	3452.75	1077.5	3.5	350695602675
2007Q3	9.283	526841550	0.364	587.007	52500000	57.4662	4381.93	82.4915	3494.5	1035	4	359905906550
2007Q4	9.4415	572870475	0.36	640.132	53250000	61.5899	4464.98	83.6623	3536.25	992.5	4.5	369116210425
2008Q1	9.6	618899400	0.356	693.257	54000000	66.1351	4548.02	84.8331	3578	950	5	378326514300
2008Q2	10.1445	600566400	0.35125	683.899	54750000	70.9551	4615.79	84.6845	3583.5	937.5	5	386652112475
2008Q3	10.689	582233400	0.3465	674.542	55500000	75.5858	4683.56	84.5359	3589	925	5	394977710650
2008Q4	11.2335	563900400	0.34175	665.184	56250000	79.4834	4751.32	84.3873	3594.5	912.5	5	403303308825
2009Q1	11.778	545567400	0.337	655.827	57000000	82.1043	4819.09	84.2387	3600	900	5	411628907000
2009Q2	12.436	550538100	0.333	681.568	57750000	83.129	4934.95	88.179	3598	912.5	5	424544317950
2009Q3	13.094	555508800	0.329	707.309	58500000	83.1343	5050.8	92.1194	3596	925	5	437459728900
2009Q4	13.752	560479500	0.325	733.05	59250000	82.9211	5166.66	96.0597	3594	937.5	5	450375139850
2010Q1	14.41	565450200	0.321	758.791	60000000	83.2904	5282.51	100	3592	950	5	463290550800
2010Q2	15.0322	567750600	0.3175	839.416	60500000	84.9398	5391.92	101.353	3621.5	910	4.75	476237548350
2010Q3	15.6545	570051000	0.314	920.041	61000000	88.1537	5501.32	102.705	3651	870	4.5	489184545900
2010Q4	16.2767	572351400	0.3105	1000.67	61500000	93.1134	5610.72	104.058	3680.5	830	4.25	502131543450
2011Q1	16.899	574651800	0.307	1081.29	62000000	100	5720.12	105.411	3710	790	4	515078541000
2011Q2	17.0993	567665550	0.3025	1116.2	63000000	108.731	5803.5	106.107	3687.25	805	4	526214296500
2011Q3	17.2995	560679300	0.298	1151.1	64000000	118.166	5886.87	106.804	3664.5	820	4	537350052000
2011Q4	17.4997	553693050	0.2935	1186.01	65000000	126.904	5970.24	107.5	3641.75	835	4	548485807500
2012Q1	17.7	546706800	0.289	1220.91	66000000	133.541	6053.62	108.197	3619	850	4	559621563000
2012Q2	17.93	547347375	0.2835	1238.91	67000000	137.129	6170.67	108.908	3670.25	887.5	4.25	574426729250
2012Q3	18.16	547987950	0.278	1256.91	68000000	138.535	6287.73	109.619	3721.5	925	4.5	589231895500
2012Q4	18.39	548628525	0.2725	1274.91	69000000	139.08	6404.78	110.33	3772.75	962.5	4.75	604037061750
2013Q1	18.62	549269100	0.267	1292.91	70000000	140.088	6521.84	111.04	3824	1000	5	618842228000
2013Q2	18.8615	559278675	0.2615	1316.83	71000000	142.57	6643.31	111.596	3841	1060	5	634711652500
2013Q3	19.103	569288250	0.256	1340.75	72000000	146.311	6764.78	112.151	3858	1120	5	650581077000
2013Q4	19.3445	579297825	0.2505	1364.66	73000000	150.787	6886.26	112.706	3875	1180	5	666450501500
2014Q1	19.586	589307400	0.245	1388.58	74000000	155.472	7007.73	113.262	3892	1240	5	682319926000
2014Q2	19.8337	577647450	0.2405	1427.46	74750000	159.943	7141.26	113.669	3903.75	1055	5	700047387500
2014Q3	20.0815	565987500	0.236	1466.34	75500000	164.185	7274.8	114.075	3915.5	870	5	717774849000
2014Q4	20.3292	554327550	0.2315	1505.22	76250000	168.282	7408.34	114.482	3927.25	685	5	735502310500
2015Q1	20.577	542667600	0.227	1544.1	77000000	172.319	7541.87	114.889	3939	500	5	753229772000
2015Q2	20.8652	543677400	0.22375	1572.6	77750000	176.368	7634.34	115.464	3946	625	4.75	767469141500
2015Q3	21.1535	544687200	0.2205	1601.1	78500000	180.436	7726.81	116.038	3953	750	4.5	781708511000
2015Q4	21.4417	545697000	0.21725	1629.6	79250000	184.517	7819.27	116.613	3960	875	4.25	795947880500
2016Q1	21.73	546706800	0.214	1658.1	80000000	188.604	7911.74	117.187	3967	1000	4	810187250000
2016Q2	22.2625	547347375	0.212	1732.71	81000000	192.692	7989.3	117.39	3993.75	1025	3.75	830795437500
2016Q3	22.795	547987950	0.21	1807.33	82000000	196.781	8066.87	117.594	4020.5	1050	3.5	851403625000
2016Q4	23.3275	548628525	0.208	1881.94	83000000	200.869	8144.43	117.797	4047.25	1075	3.25	872011812500
2017Q1	23.86	549269100	0.206	1956.55	84000000	204.957	8222	118	4074	1100	3	892620000000
2017Q2	24.745	559278675	0.2045	2023.55	84750000	209.046	8305.25	118.25	4080.5	1125	3	909802935000
2017Q3	25.63	569288250	0.203	2090.55	85500000	213.134	8388.5	118.5	4087	1150	3	926985870000
2017Q4	26.515	579297825	0.2015	2157.55	86250000	217.223	8471.75	118.75	4093.5	1175	3	944168805000
2018Q1	27.4	589307400	0.2	2224.55	87000000	221.311	8555	119	4100	1200	3	961351740000
2018Q2	28.05	577647450	0.225	2352.44	84750000	225.399	8610.5	119.5	4112.5	1200	3	982982154150
2018Q3	28.7	565987500	0.25	2480.32	82500000	229.488	8666	120	4125	1200	3	1004612568300
2018Q4	29.35	554327550	0.275	2608.21	80250000	233.576	8721.5	120.5	4137.5	1200	3	1026242982450
2019Q1	30	542667600	0.3	2736.1	78000000	237.665	8777	121	4150	1200	3	1047873396600
2019Q2	30	542667600	0.3	2736.1	78000000	241.753	8777	121	4150	1200	3	1047873396600
2019Q3	30	542667600	0.3	2736.1	78000000	245.841	8777	121	4150	1200	3	1047873396600
2019Q4	30	542667600	0.3	2736.1	78000000	249.93	8777	121	4150	1200	3	1047873396600

## Sheet: legend
Variab;e	Description
p	population numer in each year which will be stationary after log difference
percapita	real gdp per capita,stationary at log difference,							in log	change in real gdp percapita growth
tech	technology=measured as crop production per hectar
rain	weather=measured interms of annual rainfall stationary at level							in log	change in rinfall
pins	political stability=5 secured and 1 for insecured year
aid	measured as the total aid suppled by donors stationary at log difference							in log
e	nominal exchange rate to meaure food import						in log	change in exchange rate growth
fpindex	annual food price index change to measure food inflation						in log	change in inflation
wpf	China Consumer price index (2010 = 100) stationary at log difference
gdp def	ethiopian gdp ddeflateor 2010=100
g	government spending as perc of rgdp						in log	in percentage		percentage growth
fimp	food import as a percentage merchandize import							percentage
fins	percentage of people undernorished=stationary at difference							in annual percentage difference		wb
bs	percentage of people in accesss to basic water service to measure food secured peope=stationary at difference							in percentage		wb
wwp	wheat price us dollar per metric ton							change in the growth of price		imf
		The model
endo	nsp log(pf) log(aid) log(e) log(rgdp) log(pnf) log(fsp) log(a)
exo	log(w) log(ip) log(pins)

## Sheet: nominal
T	FINS	FSEC	E	FAID	FINDEX	FP	G	GDPDEF	P	PINS	RAIN	RGDP	TECH	WPF
1988Q1	0.539	0.46	2.05498	192566700	45	106.99	4.9	14.9871	45000000	3	870	150672779000	2641	28.9315
1988Q2	0.53774	0.46	2.05874	1.64611e+08	45.4909	109.334	5.18853	15.2616	4.51876e+07	3.03598	887.466	1.50038e+11	2679.5	30.5182
1988Q3	0.537084	0.46	2.06249	1.40265e+08	45.9854	111.49	5.44165	15.51	4.54002e+07	3.05757	910.946	1.49602e+11	2717.61	31.9981
1988Q4	0.537636	0.46	2.06625	1.23134e+08	46.4872	113.268	5.62395	15.7062	4.56627e+07	3.05038	946.453	1.49566e+11	2754.91	33.2644
1989Q1	0.54	0.46	2.07	116829000	47	114.48	5.7	15.8241	46000000	3	1000	150128783700	2791	34.2103
1989Q2	0.544316	0.4575	2.07352	1.23318e+08	47.5238	115.174	5.6495	15.8587	4.64278e+07	2.89082	1072.68	1.51363e+11	2825.25	34.7696
1989Q3	0.548872	0.455	2.07563	1.38014e+08	48.0439	116.347	5.51254	15.8894	4.69245e+07	2.70228	1145.91	1.52832e+11	2856.11	35.0388
1989Q4	0.551492	0.4525	2.07493	1.54691e+08	48.5421	119.234	5.34431	16.0169	4.74589e+07	2.4126	1196.19	1.53973e+11	2881.79	35.1547
1990Q1	0.55	0.45	2.07	167121900	49	125.07	5.2	16.3418	48000000	2	1200	154221972600	2900.5	35.2545
1990Q2	0.543011	0.46	2.06085	1.70944e+08	49.3984	134.561	5.11815	16.9308	4.85229e+07	1.47888	1142.74	1.53144e+11	2910.89	35.4481
1990Q3	0.532303	0.47	2.05311	1.69245e+08	49.714	146.307	5.07068	17.7152	4.90269e+07	1.00832	1045.4	1.50814e+11	2913.37	35.7379
1990Q4	0.520443	0.48	2.05381	1.66976e+08	49.9226	158.377	5.01288	18.5926	4.95175e+07	0.783605	937.861	1.47437e+11	2908.79	36.0995
1991Q1	0.51	0.49	2.07	169087500	50	168.844	4.9	19.4605	50000000	1	850	143214410600	2898	36.5084
1991Q2	0.502858	0.495	2.11454	1.7868e+08	49.9451	176.274	4.70603	20.2427	5.04805e+07	1.77181	807.124	1.38489e+11	2881.9	36.9508
1991Q3	0.498166	0.5	2.22357	1.91458e+08	49.85	181.218	4.47972	20.9695	5.09678e+07	2.88944	816.224	1.34155e+11	2861.59	37.4574
1991Q4	0.494392	0.505	2.43907	2.01275e+08	49.8299	184.724	4.28856	21.6975	5.14712e+07	4.06236	879.712	1.31246e+11	2838.24	38.0693
1992Q1	0.49	0.51	2.803	201984300	50	187.84	4.2	22.4831	52000000	5	1000	130794169300	2813	38.8281
1992Q2	0.483917	0.51625	3.33261	1.89856e+08	50.4277	191.374	4.26556	23.3543	5.2555e+07	5.48077	1170.17	1.33423e+11	2787.68	39.7804
1992Q3	0.476906	0.5225	3.94623	1.70822e+08	50.9885	195.185	4.47292	24.2235	5.31019e+07	5.55891	1345.95	1.38115e+11	2766.7	40.9943
1992Q4	0.470193	0.52875	4.53749	1.5323e+08	51.5101	198.892	4.79383	24.9744	5.35979e+07	5.35759	1473.76	1.43444e+11	2755.12	42.5433
1993Q1	0.465	0.535	5	145430100	51.82	202.115	5.2	25.4907	54000000	5	1500	147984229800	2758	44.5009
1993Q2	0.462196	0.535975	5.2591	1.53006e+08	51.813	204.707	5.66143	25.7084	5.4284e+07	4.60198	1393.46	1.50668e+11	2777.68	46.9001
1993Q3	0.461221	0.53695	5.36701	1.70491e+08	51.6522	207.453	6.14109	25.7734	5.44997e+07	4.24993	1212.47	1.51863e+11	2805.59	49.6118
1993Q4	0.461161	0.537925	5.40767	1.89654e+08	51.5678	211.369	6.6002	25.8838	5.47155e+07	4.02292	1037.75	1.523e+11	2830.46	52.4668
1994Q1	0.4611	0.5389	5.465	202265100	51.79	217.475	7	26.2378	55000000	4	950	152704874300	2841	55.2956
1994Q2	0.460318	0.540425	5.60136	2.02298e+08	52.5051	226.126	7.31842	26.9637	5.54029e+07	4.2207	1003.49	1.53705e+11	2830.27	57.9541
1994Q3	0.458872	0.54195	5.79272	1.92547e+08	53.724	235.034	7.60023	27.9093	5.58995e+07	4.56638	1146.65	1.5552e+11	2808.68	60.3994
1994Q4	0.457015	0.543475	5.99347	1.7801e+08	55.4133	241.252	7.90693	28.8526	5.64463e+07	4.87887	1301.49	1.58266e+11	2791.01	62.6137
1995Q1	0.455	0.545	6.158	163684800	57.54	241.83	8.3	29.5717	57000000	5	1390	162061882900	2792	64.5795
1995Q2	0.453073	0.54625	6.25336	1.53425e+08	60.0289	235.011	8.81334	29.905	5.75263e+07	4.82772	1356.19	1.66901e+11	2821.62	66.2844
1995Q3	0.451454	0.5475	6.29724	1.46502e+08	62.637	223.801	9.37049	29.9335	5.80274e+07	4.48454	1232.16	1.72284e+11	2870.61	67.7376
1995Q4	0.450358	0.54875	6.32	1.41041e+08	65.079	212.398	9.86739	29.7988	5.85148e+07	4.14909	1072.06	1.77591e+11	2924.92	68.9539
1996Q1	0.45	0.55	6.352	135167400	67.07	205	10.2	29.6424	59000000	4	930	182199974100	2970.5	69.9479
1996Q2	0.450465	0.5495	6.41609	1.27662e+08	68.3742	204.566	10.2985	29.5759	5.94921e+07	4.1559	848.792	1.85594e+11	2996.96	70.7326
1996Q3	0.451326	0.549	6.50519	1.19929e+08	68.9532	209.104	10.2303	29.59	5.9991e+07	4.49545	825.938	1.87673e+11	3008.57	71.3153
1996Q4	0.452023	0.5485	6.60469	1.14026e+08	68.8181	215.382	10.0969	29.6457	6.04944e+07	4.83726	847.615	1.88444e+11	3013.27	71.7017
1997Q1	0.452	0.548	6.7	112014900	67.98	220.17	10	29.7037	61000000	5	900	187909951600	3019	71.8974
1997Q2	0.4508	0.551	6.78229	1.15105e+08	66.5296	221.115	10.0303	29.7323	6.15054e+07	4.86116	968.643	1.86211e+11	3031.86	71.9144
1997Q3	0.448369	0.554	6.86576	1.21114e+08	64.8766	219.376	10.2357	29.7302	6.20086e+07	4.53368	1036.58	1.84023e+11	3050.67	71.7895
1997Q4	0.444754	0.557	6.97034	1.27013e+08	63.5102	216.992	10.6533	29.7037	6.25075e+07	4.18936	1086.23	1.82153e+11	3072.39	71.5659
1998Q1	0.44	0.56	7.116	129770100	62.92	216	11.32	29.6591	63000000	4	1100	181411764000	3094	71.2866
1998Q2	0.434647	0.5595	7.31383	1.27317e+08	63.4335	217.903	12.2461	29.6165	6.34862e+07	4.08697	1067.42	1.82371e+11	3112.67	70.9924
1998Q3	0.431198	0.559	7.53953	1.21428e+08	64.7318	222.059	13.3343	29.6522	6.39745e+07	4.36985	1006.48	1.84657e+11	3126.31	70.714
1998Q4	0.432651	0.5585	7.75997	1.1484e+08	66.3342	227.289	14.4603	29.8561	6.44756e+07	4.71781	942.3	1.87662e+11	3133.05	70.4798
1999Q1	0.442	0.558	7.942	110289600	67.76	232.416	15.5	30.3183	65000000	5	900	190776503800	3131	70.3182
1999Q2	0.460707	0.5385	8.06176	1.09795e+08	68.6501	236.263	16.343	31.0763	6.55499e+07	5.1191	896.851	1.93551e+11	3119.7	70.2502
1999Q3	0.484088	0.519	8.13249	1.12501e+08	69.1323	237.658	16.9347	31.9574	6.60934e+07	5.11192	918.758	1.96174e+11	3104.45	70.2678
1999Q4	0.505926	0.4995	8.17673	1.16834e+08	69.4558	235.433	17.234	32.7363	6.65902e+07	5.04878	943.786	1.98995e+11	3091.97	70.3557
2000Q1	0.52	0.48	8.217	121221900	69.87	228.416	17.2	33.1878	67000000	5	950	202362775800	3089	70.4985
2000Q2	0.521901	0.4875	8.27064	1.24378e+08	70.5903	216.31	16.8292	33.1501	6.72986e+07	5.01475	922.994	2.06483e+11	3099.95	70.6761
2000Q3	0.514449	0.495	8.33424	1.26167e+08	71.6964	202.299	16.2671	32.7154	6.75269e+07	5.05747	878.491	2.10994e+11	3120.02	70.8492
2000Q4	0.502272	0.5025	8.39923	1.26739e+08	73.2343	190.442	15.6964	32.0394	6.77417e+07	5.07146	839.742	2.15389e+11	3142.07	70.9739
2001Q1	0.49	0.51	8.457	126246600	75.25	184.796	15.3	31.2778	68000000	5	830	219161529700	3159	71.006
2001Q2	0.481237	0.51575	8.50091	1.25577e+08	77.7242	188.153	15.223	30.5808	6.83493e+07	4.80628	865.547	2.21879e+11	3165.22	70.9193
2001Q3	0.475492	0.5215	8.53204	1.28564e+08	80.3771	198.246	15.4596	30.0774	6.87991e+07	4.53319	934.78	2.2339e+11	3161.3	70.7582
2001Q4	0.471251	0.52725	8.55339	1.39776e+08	82.864	211.548	15.9664	29.891	6.93493e+07	4.2435	1019.12	2.23617e+11	3149.35	70.5849
2002Q1	0.467	0.533	8.568	163784700	84.84	224.526	16.7	30.1451	70000000	4	1100	222481225700	3131.5	70.4616
2002Q2	0.461574	0.53925	8.57857	2.02665e+08	86.0656	234.397	17.5984	30.8998	7.07417e+07	3.85387	1161.69	2.20138e+11	3111.22	70.4437
2002Q3	0.455208	0.5455	8.58661	2.48515e+08	86.7227	241.361	18.5258	31.9632	7.15269e+07	3.80978	1199.89	2.17674e+11	3097.49	70.5599
2002Q4	0.448488	0.55175	8.59335	2.90942e+08	87.0984	246.362	19.3278	33.0797	7.22986e+07	3.86081	1213.14	2.16412e+11	3100.63	70.832
2003Q1	0.442	0.558	8.6	319550400	87.48	250.346	19.85	33.994	73000000	4	1200	217672606100	3131	71.2821
2003Q2	0.436172	0.5635	8.60755	3.27379e+08	88.1202	254.162	20.0028	34.5258	7.35902e+07	4.20012	1161.28	2.22353e+11	3193.66	71.9126
2003Q3	0.430802	0.569	8.61613	3.21201e+08	89.1346	258.276	19.9558	34.7948	7.40934e+07	4.35268	1106.91	2.29653e+11	3272.58	72.648
2003Q4	0.425531	0.5745	8.62565	3.11224e+08	90.6041	263.056	19.9434	34.9958	7.45499e+07	4.32891	1049.08	2.38349e+11	3346.46	73.3935
2004Q1	0.42	0.58	8.636	307654200	92.61	268.871	20.2	35.3236	75000000	4	1000	247216445100	3394	74.0541
2004Q2	0.413989	0.58575	8.64682	3.17623e+08	95.1557	275.995	20.8958	35.9262	7.54756e+07	3.29878	968.974	2.55289e+11	3400.43	74.5577
2004Q3	0.407836	0.5915	8.6566	3.35963e+08	97.934	284.327	21.9445	36.7653	7.59745e+07	2.40448	953.737	2.62633e+11	3377.09	74.9222
2004Q4	0.402014	0.59725	8.66359	3.54429e+08	100.56	293.667	23.196	37.7556	7.64862e+07	1.55794	949.132	2.69573e+11	3341.83	75.1886
2005Q1	0.397	0.603	8.666	364778100	102.65	303.82	24.5	38.812	77000000	1	950	276434378100	3312.5	75.3975
2005Q2	0.393121	0.606	8.6637	3.61417e+08	103.924	314.709	25.7368	39.8697	7.75075e+07	0.901634	952.668	2.83491e+11	3302.76	75.5901
2005Q3	0.390106	0.609	8.66309	3.49356e+08	104.529	326.745	26.9098	40.9451	7.80086e+07	1.15439	959.395	2.90819e+11	3309.38	75.8096
2005Q4	0.387539	0.612	8.67218	3.36257e+08	104.717	340.458	28.0528	42.0749	7.85054e+07	1.57995	973.925	2.98442e+11	3324.94	76.0993
2006Q1	0.385	0.615	8.699	329780700	104.74	356.381	29.2	43.2957	79000000	2	1000	306385288500	3342	76.5029
2006Q2	0.382153	0.61825	8.7488	3.36205e+08	104.832	375.481	30.4007	44.6587	7.94945e+07	2.28218	1038.64	3.14668e+11	3355.23	77.0641
2006Q3	0.37899	0.6215	8.81568	3.56273e+08	105.154	400.476	31.7664	46.2731	7.99912e+07	2.47797	1079.93	3.23286e+11	3367.7	77.8284
2006Q4	0.375581	0.62475	8.89097	3.89346e+08	105.849	434.516	33.4239	48.2628	8.04922e+07	2.68477	1111.26	3.32228e+11	3384.57	78.8418
2007Q1	0.372	0.628	8.966	434783700	107.06	480.757	35.5	50.7515	81000000	3	1120	341485298800	3411	80.1499
2007Q2	0.368297	0.632	9.04007	4.90252e+08	108.853	539.889	38.0664	53.831	8.15145e+07	3.48525	1097.79	3.50998e+11	3450	81.7298
2007Q3	0.364435	0.636	9.14433	5.46635e+08	110.986	602.759	40.9745	57.4662	8.20268e+07	4.05875	1053.37	3.60511e+11	3496	83.2823
2007Q4	0.360356	0.64	9.31793	5.93121e+08	113.138	657.753	44.0203	61.5899	8.25257e+07	4.60287	999.772	3.69721e+11	3541.24	84.4394
2008Q1	0.356	0.644	9.6	618899400	114.99	693.257	47	66.1351	83000000	5	950	378326514300	3578	84.8331
2008Q2	0.351346	0.64875	10.0169	6.17016e+08	116.362	701.527	49.7647	70.9551	8.34475e+07	5.16743	914.738	3.86195e+11	3600.33	84.2958
2008Q3	0.346519	0.6535	10.5439	5.95946e+08	117.638	690.304	52.3856	75.5858	8.39016e+07	5.16205	895.319	3.93882e+11	3609.43	83.4613
2008Q4	0.341683	0.65825	11.1434	5.68019e+08	119.343	671.2	54.9887	79.4834	8.4405e+07	5.07564	890.741	4.02117e+11	3608.32	83.1642
2009Q1	0.337	0.663	11.778	545567400	122	655.827	57.7	82.1043	85000000	5	900	411628907000	3600	84.2387
2009Q2	0.332601	0.667	12.4178	5.37926e+08	125.898	654.154	60.6324	83.129	8.57113e+07	5.00127	920.447	4.22931e+11	3588.05	87.2233
2009Q3	0.328487	0.671	13.0639	5.42452e+08	130.381	669.584	63.8456	83.1343	8.64917e+07	5.04306	942.849	4.3568e+11	3578.4	91.4726
2009Q4	0.32463	0.675	13.7251	5.53506e+08	134.556	703.876	67.386	82.9211	8.72763e+07	5.06331	956.326	4.49319e+11	3577.55	96.0453
2010Q1	0.321	0.679	14.41	565450200	137.53	758.791	71.3	83.2904	88000000	5	950	463290550800	3592	100
2010Q2	0.317549	0.6825	15.1171	5.73665e+08	138.709	833.924	75.6681	84.9398	8.86137e+07	4.81186	917.381	4.77096e+11	3624.78	102.624
2010Q3	0.314157	0.686	15.8032	5.77615e+08	138.684	920.206	80.7071	88.1537	8.91315e+07	4.54073	869.536	4.90467e+11	3664.97	104.115
2010Q4	0.310686	0.6895	16.415	5.77783e+08	138.344	1006.41	86.6674	93.1134	8.95836e+07	4.24924	821.924	5.03198e+11	3698.18	104.902
2011Q1	0.307	0.693	16.899	574651800	138.58	1081.29	93.8	100	90000000	4	790	515078541000	3710	105.411
2011Q2	0.302986	0.6975	17.2207	5.6883e+08	140.03	1136.41	102.268	108.731	9.04121e+07	3.84505	784.874	5.26053e+11	3691.71	105.991
2011Q3	0.298636	0.702	17.4213	5.61416e+08	142.337	1174.42	111.889	118.166	9.08572e+07	3.79402	800.257	5.36668e+11	3657.33	106.678
2011Q4	0.293968	0.7065	17.561	5.53634e+08	144.893	1200.77	122.39	126.904	9.13736e+07	3.84599	825.511	5.47625e+11	3626.53	107.428
2012Q1	0.289	0.711	17.7	546706800	147.09	1220.91	133.5	133.541	92000000	4	850	559621563000	3619	108.197
2012Q2	0.283758	0.7165	17.8854	5.41815e+08	148.479	1239.42	144.924	137.129	9.27534e+07	4.24546	867.343	5.73153e+11	3648.32	108.949
2012Q3	0.2783	0.722	18.1124	5.39968e+08	149.245	1257.41	156.263	138.535	9.35648e+07	4.53317	888.188	5.8789e+11	3703.59	109.675
2012Q4	0.272692	0.7275	18.3632	5.42131e+08	149.731	1275.16	167.096	139.08	9.43438e+07	4.8043	927.439	6.03298e+11	3767.82	110.373
2013Q1	0.267	0.733	18.62	549269100	150.28	1292.91	177	140.088	95000000	5	1000	618842228000	3824	111.04
2013Q2	0.261294	0.7385	18.8686	5.61449e+08	151.197	1311.24	185.706	142.57	9.54806e+07	5.07937	1110.13	6.34155e+11	3859.26	111.674
2013Q3	0.255663	0.744	19.1096	5.75137e+08	152.638	1331.91	193.559	146.311	9.58836e+07	5.07329	1219.49	6.49531e+11	3877.2	112.263
2013Q4	0.2502	0.7495	19.3473	5.85901e+08	154.72	1357	201.057	150.787	9.63448e+07	5.03056	1279.11	6.65432e+11	3885.54	112.796
2014Q1	0.245	0.755	19.586	589307400	157.56	1388.58	208.7	155.472	97000000	5	1240	682319926000	3892	113.262
2014Q2	0.240129	0.7595	19.8289	5.82517e+08	161.117	1427.52	216.901	159.943	9.79182e+07	5.01517	1074.8	7.00409e+11	3902.52	113.658
2014Q3	0.235548	0.764	20.0759	5.69062e+08	164.716	1469.86	225.739	164.185	9.89009e+07	5.04866	842.592	7.18933e+11	3915.88	114.027
2014Q4	0.231193	0.7685	20.3257	5.5407e+08	167.522	1510.44	235.207	168.282	9.96833e+07	5.05782	624.091	7.36878e+11	3929.04	114.42
2015Q1	0.227	0.773	20.577	542667600	168.7	1544.1	245.3	172.319	100000000	5	500	753229772000	3939	114.889
2015Q2	0.222957	0.77625	20.8312	5.38593e+08	167.751	1568.04	255.976	176.368	9.97218e+07	4.84432	526.62	7.6741e+11	3943.99	115.465
2015Q3	0.219271	0.7795	21.0991	5.40039e+08	165.516	1588.98	267.049	180.436	9.92627e+07	4.60706	662.639	7.80571e+11	3947.29	116.092
2015Q4	0.216199	0.78275	21.3943	5.43809e+08	163.17	1615.97	278.297	184.517	9.91721e+07	4.31627	842.338	7.94301e+11	3953.45	116.692
2016Q1	0.214	0.786	21.73	546706800	161.89	1658.1	289.5	188.604	100000000	4	1000	810187250000	3967	117.187
2016Q2	0.212729	0.788	22.1215	5.46532e+08	162.524	1721.27	300.484	192.692	1.02085e+08	3.68567	1085.6	8.29278e+11	3990.73	117.523
2016Q3	0.211619	0.79	22.5909	5.45056e+08	164.612	1798.7	311.267	196.781	1.04923e+08	3.39811	1111.85	8.50474e+11	4020.45	117.733
2016Q4	0.2097	0.792	23.1624	5.45046e+08	167.367	1880.45	321.917	200.869	1.078e+08	3.16149	1107.18	8.72134e+11	4050.19	117.873
2017Q1	0.206	0.794	23.86	549269100	170	1956.55	332.5	204.957	110000000	3	1100	892620000000	4074	118
2017Q2	0.200267	0.7955	24.6922	5.59327e+08	171.903	2020.48	343.072	209.046	1.11e+08	2.92862	1112.24	9.10782e+11	4087.63	118.161
2017Q3	0.195127	0.797	25.6055	5.72165e+08	173.182	2079.41	353.644	213.134	1.11044e+08	2.92552	1139.95	9.27428e+11	4093.66	118.375
2017Q4	0.193923	0.7985	26.5311	5.83565e+08	174.119	2143.9	364.216	217.223	1.10565e+08	2.95965	1172.68	9.43852e+11	4096.36	118.651
2018Q1	0.2	0.8	27.4	589307400	175	2224.55	374.788	221.311	110000000	3	1200	961351740000	4100	119
2018Q2	0.215703	0.775	28.1599	5.86289e+08	176.051	2329.05	385.359	225.399	1.09696e+08	3.02172	1213.87	9.80907e+11	4107.93	119.427
2018Q3	0.239374	0.75	28.8257	5.75863e+08	177.273	2453.59	395.931	229.488	1.09652e+08	3.02483	1215.85	1.00224e+12	4119.78	119.917
2018Q4	0.268359	0.725	29.4285	5.605e+08	178.608	2591.51	406.503	233.576	1.09783e+08	3.01552	1209.91	1024761077206	4134.24	120.448
2019Q1	0.3	0.7	30	542667600	180	2736.1	417.075	237.665	110000000	3	1200	1047873396600	4150	121
2019Q2	0.332084	0.7	30.5662	5.24424e+08	181.401	2881.81	427.647	241.753	1.10232e+08	2.98345	1189.43	1.07108e+12	4165.98	121.555
2019Q3	0.364167	0.7	31.1325	5.0618e+08	182.803	3027.52	438.219	245.841	1.10464e+08	2.9669	1178.87	1.0943e+12	4181.96	122.111
2019Q4	0.396251	0.7	31.6987	4.87936e+08	184.204	3173.22	448.791	249.93	1.10696e+08	2.95034	1168.3	1.11751e+12	4197.94	122.666

## Sheet: ardl nominal
T	P	E	GDPDF	FP	FAID	G	RY	M	FINS	PINS	Rain
1988Q1	7.65321	0.312808	1.17572	2.02934	8.28458	0.690196	11.178	16.2	0.539	3	2.93952
1988Q2	7.65502	0.313601	1.1836	2.03876	8.21646	0.715045	11.1762	16.2902	0.53774	3.03598	2.94815
1988Q3	7.65706	0.314392	1.19061	2.04724	8.14695	0.735731	11.1749	16.3804	0.537084	3.05757	2.95949
1988Q4	7.65956	0.315182	1.19607	2.05411	8.09038	0.750041	11.1748	16.4706	0.537636	3.05038	2.9761
1989Q1	7.66276	0.31597	1.19932	2.05873	8.06755	0.755875	11.1765	16.5608	0.54	3	3
1989Q2	7.66678	0.316708	1.20027	2.06135	8.09103	0.75201	11.18	16.5664	0.544316	2.89082	3.03047			FINS E FAID FP RY P M GDPDF G
1989Q3	7.6714	0.31715	1.20111	2.06576	8.13992	0.741352	11.1842	16.5719	0.548872	2.70228	3.05915
1989Q4	7.67632	0.317003	1.20458	2.0764	8.18946	0.727892	11.1874	16.5775	0.551492	2.4126	3.0778
1990Q1	7.68124	0.31597	1.2133	2.09715	8.22303	0.716003	11.1881	16.583	0.55	2	3.07918			exo
1990Q2	7.68595	0.314046	1.22868	2.12892	8.23285	0.709113	11.1851	16.5692	0.543011	1.47888	3.05795			RAIN PINS
1990Q3	7.69043	0.312411	1.24835	2.16526	8.22852	0.705067	11.1784	16.5554	0.532303	1.00832	3.01928
1990Q4	7.69476	0.31256	1.26934	2.19969	8.22265	0.700087	11.1686	16.5416	0.520443	0.783605	2.97214
1991Q1	7.69897	0.31597	1.28915	2.22749	8.22811	0.690196	11.156	16.5278	0.51	1	2.92942
1991Q2	7.70312	0.325216	1.30627	2.24619	8.25208	0.672654	11.1414	16.4852	0.502858	1.77181	2.90694
1991Q3	7.7073	0.347051	1.32159	2.2582	8.28207	0.651251	11.1276	16.4426	0.498166	2.88944	2.91181
1991Q4	7.71156	0.387224	1.33641	2.26652	8.30379	0.632311	11.1181	16.4001	0.494392	4.06236	2.94434
1992Q1	7.716	0.447623	1.35186	2.27379	8.30532	0.623249	11.1166	16.3575	0.49	5	3
1992Q2	7.72061	0.522784	1.36837	2.28188	8.27842	0.629976	11.1252	16.2777	0.483917	5.48077	3.06825
1992Q3	7.72511	0.596182	1.38424	2.29045	8.23254	0.650591	11.1402	16.1979	0.476906	5.55891	3.12903
1992Q4	7.72915	0.656815	1.39749	2.29862	8.18534	0.680682	11.1567	16.1181	0.470193	5.35759	3.16843
1993Q1	7.73239	0.69897	1.40638	2.3056	8.16265	0.716003	11.1702	16.0383	0.465	5	3.17609
1993Q2	7.73467	0.720912	1.41007	2.31113	8.18471	0.752926	11.178	16.1922	0.462196	4.60198	3.1441
1993Q3	7.73639	0.729733	1.41117	2.31692	8.2317	0.788245	11.1815	16.3462	0.461221	4.24993	3.08367
1993Q4	7.73811	0.73301	1.41303	2.32504	8.27796	0.819557	11.1827	16.5001	0.461161	4.02292	3.01609
1994Q1	7.74036	0.73759	1.41893	2.33741	8.30592	0.845098	11.1839	16.6541	0.4611	4	2.97772
1994Q2	7.74353	0.748293	1.43078	2.35435	8.30599	0.864417	11.1867	15.9493	0.460318	4.2207	3.00151
1994Q3	7.74741	0.762882	1.44575	2.37113	8.28454	0.880827	11.1918	15.2446	0.458872	4.56638	3.05943
1994Q4	7.75164	0.777678	1.46019	2.38247	8.25044	0.898008	11.1994	14.5398	0.457015	4.87887	3.11444
1995Q1	7.75587	0.78944	1.47088	2.38351	8.21401	0.919078	11.2097	13.835	0.455	5	3.14301
1995Q2	7.75987	0.796113	1.47574	2.37109	8.1859	0.94514	11.2225	11.7575	0.453073	4.82772	3.13232
1995Q3	7.76363	0.79915	1.47616	2.34986	8.16584	0.971762	11.2362	9.67993	0.451454	4.48454	3.09067
1995Q4	7.76727	0.800717	1.4742	2.32715	8.14935	0.994202	11.2494	7.60239	0.450358	4.14909	3.03022
1996Q1	7.77085	0.80291	1.47191	2.31175	8.13087	1.0086	11.2605	5.52485	0.45	4	2.96848
1996Q2	7.77446	0.807271	1.47094	2.31083	8.10606	1.01278	11.2686	4.75198	0.450465	4.1559	2.9288
1996Q3	7.77809	0.81326	1.47115	2.32036	8.07892	1.00989	11.2734	3.97911	0.451326	4.49545	2.91695
1996Q4	7.78172	0.819852	1.47196	2.33321	8.05701	1.00419	11.2752	3.20624	0.452023	4.83726	2.9282
1997Q1	7.78533	0.826075	1.47281	2.34276	8.04928	1	11.2739	2.43337	0.452	5	2.95424
1997Q2	7.78891	0.831377	1.47323	2.34462	8.06109	1.00131	11.27	3.33854	0.4508	4.86116	2.98616
1997Q3	7.79245	0.836688	1.4732	2.34119	8.0832	1.01012	11.2649	4.24371	0.448369	4.53368	3.0156
1997Q4	7.79593	0.843254	1.47281	2.33644	8.10385	1.02748	11.2604	5.14888	0.444754	4.18936	3.03592
1998Q1	7.79934	0.852236	1.47216	2.33445	8.11317	1.05385	11.2587	6.05406	0.44	4	3.04139
1998Q2	7.80268	0.864145	1.47153	2.33826	8.10489	1.088	11.261	6.88464	0.434647	4.08697	3.02833
1998Q3	7.80601	0.877344	1.47206	2.34647	8.08432	1.12497	11.2664	7.71523	0.431198	4.36985	3.0028
1998Q4	7.8094	0.88986	1.47503	2.35658	8.06009	1.16018	11.2734	8.54582	0.432651	4.71781	2.97419
1999Q1	7.81291	0.89993	1.4817	2.36627	8.04253	1.19033	11.2805	9.3764	0.442	5	2.95424
1999Q2	7.81657	0.90643	1.49243	2.3734	8.04058	1.21333	11.2868	8.77956	0.460707	5.1191	2.95272
1999Q3	7.82016	0.910224	1.50457	2.37595	8.05116	1.22878	11.2926	8.18271	0.484088	5.11192	2.9632
1999Q4	7.82341	0.91258	1.51503	2.37187	8.06757	1.23638	11.2988	7.58586	0.505926	5.04878	2.97487
2000Q1	7.82607	0.914713	1.52098	2.35873	8.08358	1.23553	11.3061	6.98902	0.52	5	2.97772
2000Q2	7.82801	0.917539	1.52049	2.33508	8.09474	1.22606	11.3149	8.87842	0.521901	5.01475	2.9652
2000Q3	7.82948	0.920866	1.51475	2.30599	8.10094	1.21131	11.3243	10.7678	0.514449	5.05747	2.94374
2000Q4	7.83086	0.924239	1.50568	2.27976	8.10291	1.1958	11.3332	12.6572	0.502272	5.07146	2.92415
2001Q1	7.83251	0.927216	1.49524	2.26669	8.10122	1.18469	11.3408	14.5466	0.49	5	2.91908
2001Q2	7.83473	0.929465	1.48545	2.27451	8.09891	1.1825	11.3461	13.7357	0.481237	4.80628	2.93729
2001Q3	7.83758	0.931053	1.47824	2.29721	8.10912	1.1892	11.3491	12.9247	0.475492	4.53319	2.97071
2001Q4	7.84104	0.932138	1.47554	2.32541	8.14543	1.20321	11.3495	12.1138	0.471251	4.2435	3.00823
2002Q1	7.8451	0.932879	1.47922	2.35127	8.21427	1.22272	11.3473	11.3029	0.467	4	3.04139
2002Q2	7.84968	0.933415	1.48996	2.36995	8.30678	1.24547	11.3427	13.8459	0.461574	3.85387	3.06509
2002Q3	7.85447	0.933822	1.50465	2.38267	8.39535	1.26778	11.3378	16.3889	0.455208	3.80978	3.07914
2002Q4	7.85913	0.934163	1.51956	2.39157	8.46381	1.28618	11.3353	18.9319	0.448488	3.86081	3.08391
2003Q1	7.86332	0.934498	1.5314	2.39854	8.50454	1.29776	11.3378	21.4749	0.442	4	3.07918
2003Q2	7.86682	0.93488	1.53814	2.40511	8.51505	1.30109	11.347	19.1805	0.436172	4.20012	3.06494
2003Q3	7.86978	0.935312	1.54151	2.41208	8.50678	1.30007	11.3611	16.8861	0.430802	4.35268	3.04411
2003Q4	7.87245	0.935792	1.54402	2.42005	8.49307	1.2998	11.3772	14.5917	0.425531	4.32891	3.02081
2004Q1	7.87506	0.936313	1.54807	2.42954	8.48806	1.30535	11.3931	12.2974	0.42	4	3
2004Q2	7.87781	0.936856	1.55541	2.4409	8.50191	1.32006	11.407	11.8843	0.413989	3.29878	2.98631
2004Q3	7.88067	0.937347	1.56544	2.45382	8.52629	1.34133	11.4193	11.4712	0.407836	2.40448	2.97943
2004Q4	7.88358	0.937698	1.57698	2.46786	8.54953	1.36541	11.4307	11.058	0.402014	1.55794	2.97733
2005Q1	7.88649	0.937819	1.58897	2.48262	8.56203	1.38917	11.4416	10.6449	0.397	1	2.97772
2005Q2	7.88934	0.937704	1.60064	2.49791	8.55801	1.41055	11.4525	10.106	0.393121	0.901634	2.97894
2005Q3	7.89214	0.937673	1.6122	2.51421	8.54327	1.42991	11.4636	9.56709	0.390106	1.15439	2.982
2005Q4	7.8949	0.938128	1.62402	2.53206	8.52667	1.44798	11.4749	9.02817	0.387539	1.57995	2.98853
2006Q1	7.89763	0.939469	1.63644	2.55191	8.51823	1.46538	11.4863	8.48924	0.385	2	3
2006Q2	7.90034	0.941948	1.64991	2.57459	8.5266	1.48288	11.4979	8.12006	0.382153	2.28218	3.01646
2006Q3	7.90304	0.945256	1.66533	2.60258	8.55178	1.50197	11.5096	7.75088	0.37899	2.47797	3.0334
2006Q4	7.90575	0.948949	1.68361	2.63801	8.59034	1.52406	11.5214	7.3817	0.375581	2.68477	3.04582
2007Q1	7.90849	0.952599	1.70545	2.68193	8.63827	1.55023	11.5334	7.01252	0.372	3	3.04922
2007Q2	7.91123	0.956172	1.73103	2.7323	8.69042	1.58054	11.5453	8.83902	0.368297	3.48525	3.04052
2007Q3	7.91396	0.961152	1.75941	2.78014	8.7377	1.61251	11.5569	10.6655	0.364435	4.05875	3.02258
2007Q4	7.91659	0.96932	1.78951	2.81806	8.77314	1.64365	11.5679	12.492	0.360356	4.60287	2.9999
2008Q1	7.91908	0.982271	1.82043	2.84089	8.79162	1.6721	11.5779	14.3185	0.356	5	2.97772
2008Q2	7.92141	1.00073	1.85098	2.84604	8.7903	1.69692	11.5868	13.454	0.351346	5.16743	2.9613
2008Q3	7.92377	1.023	1.87844	2.83904	8.77521	1.71921	11.5954	12.5895	0.346519	5.16205	2.95198
2008Q4	7.92637	1.04702	1.90028	2.82685	8.75436	1.74027	11.6044	11.7249	0.341683	5.07564	2.94975
2009Q1	7.92942	1.07107	1.91437	2.81679	8.73685	1.76118	11.6145	10.8604	0.337	5	2.95424
2009Q2	7.93304	1.09405	1.91975	2.81568	8.73072	1.7827	11.6263	10.8879	0.332601	5.00127	2.964
2009Q3	7.93697	1.11607	1.91978	2.8258	8.73436	1.80513	11.6392	10.9155	0.328487	5.04306	2.97444
2009Q4	7.9409	1.13752	1.91867	2.8475	8.74312	1.82857	11.6526	10.943	0.32463	5.06331	2.98061
2010Q1	7.94448	1.15866	1.92059	2.88012	8.75239	1.85309	11.6659	10.9705	0.321	5	2.97772
2010Q2	7.9475	1.17947	1.92911	2.92113	8.75866	1.87891	11.6786	11.9255	0.317549	4.81186	2.96255
2010Q3	7.95003	1.19875	1.94524	2.96389	8.76164	1.90691	11.6906	12.8804	0.314157	4.54073	2.93929
2010Q4	7.95223	1.21524	1.96901	3.00277	8.76176	1.93786	11.7017	13.8353	0.310686	4.24924	2.91483
2011Q1	7.95424	1.22786	2	3.03394	8.7594	1.9722	11.7119	14.7902	0.307	4	2.89763
2011Q2	7.95623	1.23605	2.03635	3.05553	8.75498	2.00974	11.721	13.6585	0.302986	3.84505	2.8948
2011Q3	7.95836	1.24108	2.07249	3.06982	8.74928	2.04879	11.7297	12.5267	0.298636	3.79402	2.90323
2011Q4	7.96082	1.24455	2.10348	3.07946	8.74322	2.08774	11.7385	11.3949	0.293968	3.84599	2.91672
2012Q1	7.96379	1.24797	2.12562	3.08668	8.73775	2.12548	11.7479	10.2631	0.289	4	2.92942
2012Q2	7.96733	1.2525	2.13713	3.09322	8.73385	2.16114	11.7583	10.7152	0.283758	4.24546	2.93819
2012Q3	7.97111	1.25798	2.14156	3.09948	8.73237	2.19386	11.7693	11.1672	0.2783	4.53317	2.9485
2012Q4	7.97471	1.26395	2.14327	3.10556	8.7341	2.22297	11.7805	11.6192	0.272692	4.8043	2.96729
2013Q1	7.97772	1.26998	2.1464	3.11157	8.73979	2.24797	11.7916	12.0712	0.267	5	3
2013Q2	7.97991	1.27574	2.15403	3.11768	8.74931	2.26883	11.8022	12.0712	0.261294	5.07937	3.04537
2013Q3	7.98174	1.28125	2.16528	3.12448	8.75977	2.28681	11.8126	12.0712	0.255663	5.07329	3.08618
2013Q4	7.98383	1.28662	2.17836	3.13258	8.76782	2.30332	11.8231	12.0712	0.2502	5.03056	3.10691
2014Q1	7.98677	1.29195	2.19165	3.14257	8.77034	2.31952	11.834	12.0712	0.245	5	3.09342
2014Q2	7.99086	1.2973	2.20397	3.15458	8.76531	2.33626	11.8454	12.0712	0.240129	5.01517	3.03133
2014Q3	7.9952	1.30268	2.21533	3.16728	8.75516	2.35361	11.8567	12.0712	0.235548	5.04866	2.92562
2014Q4	7.99862	1.30804	2.22604	3.1791	8.74356	2.37145	11.8674	12.0712	0.231193	5.05782	2.79525
2015Q1	8	1.31338	2.23633	3.18868	8.73453	2.3897	11.8769	12.0712	0.227	5	2.69897
2015Q2	7.99879	1.31871	2.24642	3.19536	8.73126	2.4082	11.885	12.0712	0.222957	4.84432	2.7215
2015Q3	7.99679	1.32426	2.25632	3.20112	8.73242	2.42659	11.8924	12.0712	0.219271	4.60706	2.82128
2015Q4	7.99639	1.3303	2.26604	3.20843	8.73545	2.44451	11.9	12.0712	0.216199	4.31627	2.92549
2016Q1	8	1.33706	2.27555	3.21961	8.73775	2.46165	11.9086	12.0712	0.214	4	3
2016Q2	8.00896	1.34481	2.28486	3.23585	8.73762	2.47782	11.9187	12.0712	0.212729	3.68567	3.03567
2016Q3	8.02087	1.35393	2.29398	3.25496	8.73644	2.49313	11.9297	12.0712	0.211619	3.39811	3.04605
2016Q4	8.03262	1.36478	2.30291	3.27426	8.73643	2.50774	11.9406	12.0712	0.2097	3.16149	3.04422
2017Q1	8.04139	1.37767	2.31166	3.29149	8.73979	2.52179	11.9507	12.0712	0.206	3	3.04139
2017Q2	8.04532	1.39256	2.32024	3.30546	8.74767	2.53539	11.9594	12.0712	0.200267	2.92862	3.0462
2017Q3	8.04549	1.40833	2.32865	3.31794	8.75752	2.54857	11.9673	12.0712	0.195127	2.92552	3.05689
2017Q4	8.04362	1.42376	2.33691	3.33121	8.76609	2.56136	11.9749	12.0712	0.193923	2.95965	3.06918
2018Q1	8.04139	1.43775	2.345	3.34724	8.77034	2.57379	11.9829	12.0712	0.2	3	3.07918
2018Q2	8.04019	1.44963	2.35295	3.36718	8.76811	2.58587	11.9916	12.0712	0.215703	3.02172	3.08417
2018Q3	8.04002	1.45978	2.36076	3.3898	8.76032	2.59762	12.001	12.0712	0.239374	3.02483	3.08488
2018Q4	8.04053	1.46877	2.36843	3.41355	8.74858	2.60906	12.0106	12.0712	0.268359	3.01552	3.08275
2019Q1	8.04139	1.47712	2.37596	3.43713	8.73453	2.62021	12.0203	12.0712	0.3	3	3.07918
2019Q2	8.04231	1.48524	2.38337	3.45967	8.71968	2.63109	12.0298	12.0712	0.332084	2.98345	3.07534
2019Q3	8.04322	1.49321	2.39066	3.48109	8.7043	2.64169	12.0391	12.0712	0.364167	2.9669	3.07146
2019Q4	8.04413	1.50104	2.39782	3.5015	8.68836	2.65204	12.0483	12.0712	0.396251	2.95034	3.06755

## Sheet: Sheet2
			finally used data
log(fins) log(foodp) log(ypercapita) log(e) log(fsec) log(gdpdef) log(faid) log(wfprice) pins log(rain) 1988q1 2018q4 L1=0.35 m=1
t	e	fimp	faid	findex	fins	foodp	fsec	g	gdpdef	ypercapita	wfprice	tech	RGDP	RAIN	PINS
1988Q1	0.31597	#REF!	8.28458	#REF!	0.539	2.02934	7.32222	#REF!	1.17572	3.52548	1.46137	3.42177	#REF!	2.93952	3
1988Q2	0.31597	#REF!	8.23963	#REF!	0.53925	2.03688	7.32222	#REF!	1.1836	3.52151	1.48074	3.42789	#REF!	2.95545	3
1988Q3	0.31597	#REF!	8.18948	#REF!	0.5395	2.04428	7.32222	#REF!	1.19061	3.51751	1.49929	3.43393	#REF!	2.97081	3
1988Q4	0.31597	#REF!	8.13278	#REF!	0.53975	2.05157	7.32222	#REF!	1.19607	3.51347	1.51707	3.43989	#REF!	2.98565	3
1989Q1	0.31597	#REF!	8.06755	#REF!	0.54	2.05873	7.32222	#REF!	1.19932	3.50939	1.53416	3.44576	#REF!	3	3
1989Q2	0.31597	#REF!	8.11194	#REF!	0.5425	2.06866	7.32736	#REF!	1.20027	3.50858	1.53746	3.45	#REF!	3.02119	2.75
1989Q3	0.31597	#REF!	8.15221	#REF!	0.545	2.07837	7.33244	#REF!	1.20111	3.50776	1.54073	3.4542	#REF!	3.04139	2.5
1989Q4	0.31597	#REF!	8.18907	#REF!	0.5475	2.08786	7.33746	#REF!	1.20458	3.50694	1.54399	3.45835	#REF!	3.0607	2.25
1990Q1	0.31597	#REF!	8.22303	#REF!	0.55	2.09715	7.34242	#REF!	1.2133	3.50612	1.54721	3.46247	#REF!	3.07918	2
1990Q2	0.31597	#REF!	8.22431	#REF!	0.54	2.13358	7.35218	#REF!	1.22868	3.49471	1.55106	3.46238	#REF!	3.0463	1.75
1990Q3	0.31597	#REF!	8.22558	#REF!	0.53	2.16719	7.36173	#REF!	1.24835	3.483	1.55487	3.46229	#REF!	3.01072	1.5
1990Q4	0.31597	#REF!	8.22685	#REF!	0.52	2.19838	7.37107	#REF!	1.26934	3.47096	1.55865	3.46219	#REF!	2.97197	1.25
1991Q1	0.31597	#REF!	8.22811	#REF!	0.51	2.22749	7.38021	#REF!	1.28915	3.45857	1.56239	3.4621	#REF!	2.92942	1
1991Q2	0.352809	#REF!	8.24874	#REF!	0.505	2.23953	7.38917	#REF!	1.30627	3.44545	1.56924	3.4589	#REF!	2.94817	2
1991Q3	0.386766	#REF!	8.26843	#REF!	0.5	2.25125	7.39794	#REF!	1.32159	3.43193	1.57598	3.45568	#REF!	2.96614	3
1991Q4	0.41826	#REF!	8.28726	#REF!	0.495	2.26267	7.40654	#REF!	1.33641	3.41796	1.58261	3.45244	#REF!	2.9834	4
1992Q1	0.447623	#REF!	8.30532	#REF!	0.49	2.27379	7.41497	#REF!	1.35186	3.40354	1.58915	3.44917	#REF!	3	5
1992Q2	0.525336	#REF!	8.2738	#REF!	0.48375	2.28196	7.42732	#REF!	1.36837	3.41337	1.60473	3.44704	#REF!	3.05115	5
1992Q3	0.591232	#REF!	8.23982	#REF!	0.4775	2.28998	7.43933	#REF!	1.38424	3.42298	1.61977	3.4449	#REF!	3.09691	5
1992Q4	0.648433	#REF!	8.20295	#REF!	0.47125	2.29786	7.45102	#REF!	1.39749	3.43239	1.6343	3.44275	#REF!	3.1383	5
1993Q1	0.69897	#REF!	8.16265	#REF!	0.465	2.3056	7.4624	#REF!	1.40638	3.44159	1.64837	3.44059	#REF!	3.17609	5
1993Q2	0.708952	#REF!	8.20314	#REF!	0.464025	2.31377	7.46613	#REF!	1.41007	3.44122	1.67394	3.44385	#REF!	3.13434	4.75
1993Q3	0.718709	#REF!	8.24017	#REF!	0.46305	2.3218	7.46982	#REF!	1.41117	3.44085	1.69809	3.44708	#REF!	3.08814	4.5
1993Q4	0.728252	#REF!	8.27429	#REF!	0.462075	2.32967	7.47349	#REF!	1.41303	3.44047	1.72096	3.45029	#REF!	3.03643	4.25
1994Q1	0.73759	#REF!	8.30592	#REF!	0.4611	2.33741	7.47712	#REF!	1.41893	3.4401	1.74269	3.45347	#REF!	2.97772	4
1994Q2	0.751144	#REF!	8.2847	#REF!	0.459575	2.3494	7.48073	#REF!	1.43078	3.44297	1.76055	3.45159	#REF!	3.02531	4.25
1994Q3	0.764288	#REF!	8.26239	#REF!	0.45805	2.36107	7.4843	#REF!	1.44575	3.44581	1.7777	3.44971	#REF!	3.06819	4.5
1994Q4	0.777046	#REF!	8.23887	#REF!	0.456525	2.37244	7.48785	#REF!	1.46019	3.44864	1.7942	3.44782	#REF!	3.10721	4.75
1995Q1	0.78944	#REF!	8.21401	#REF!	0.455	2.38351	7.49136	#REF!	1.47088	3.45145	1.81009	3.44592	#REF!	3.14301	5
1995Q2	0.792847	#REF!	8.19467	#REF!	0.45375	2.36665	7.49831	#REF!	1.47574	3.46103	1.81903	3.4528	#REF!	3.10551	4.75
1995Q3	0.796227	#REF!	8.17443	#REF!	0.4525	2.34911	7.50515	#REF!	1.47616	3.4704	1.82778	3.45958	#REF!	3.06446	4.5
1995Q4	0.799582	#REF!	8.15319	#REF!	0.45125	2.33083	7.51188	#REF!	1.4742	3.47957	1.83636	3.46626	#REF!	3.01912	4.25
1996Q1	0.80291	#REF!	8.13087	#REF!	0.45	2.31175	7.51851	#REF!	1.47191	3.48856	1.84477	3.47283	#REF!	2.96848	4
1996Q2	0.808818	#REF!	8.11186	#REF!	0.4505	2.31971	7.51851	#REF!	1.47094	3.48861	1.84779	3.4746	#REF!	2.96497	4.25
1996Q3	0.814647	#REF!	8.09199	#REF!	0.451	2.32753	7.51851	#REF!	1.47115	3.48867	1.85078	3.47636	#REF!	2.96142	4.5
1996Q4	0.820399	#REF!	8.07116	#REF!	0.4515	2.33521	7.51851	#REF!	1.47196	3.48873	1.85376	3.47812	#REF!	2.95785	4.75
1997Q1	0.826075	#REF!	8.04928	#REF!	0.452	2.34276	7.51851	#REF!	1.47281	3.48879	1.85671	3.47986	#REF!	2.95424	5
1997Q2	0.832764	#REF!	8.06615	#REF!	0.449	2.3407	7.52504	#REF!	1.47323	3.48195	1.85579	3.48255	#REF!	2.97772	4.75
1997Q3	0.839352	#REF!	8.0824	#REF!	0.446	2.33863	7.53148	#REF!	1.4732	3.47499	1.85486	3.48522	#REF!	3	4.5
1997Q4	0.845842	#REF!	8.09806	#REF!	0.443	2.33654	7.53782	#REF!	1.47281	3.46793	1.85394	3.48788	#REF!	3.02119	4.25
1998Q1	0.852236	#REF!	8.11317	#REF!	0.44	2.33445	7.54407	#REF!	1.47216	3.46075	1.85301	3.49052	#REF!	3.04139	4
1998Q2	0.864659	#REF!	8.09656	#REF!	0.4405	2.34263	7.54716	#REF!	1.47153	3.46308	1.85153	3.49182	#REF!	3.02119	4.25
1998Q3	0.876737	#REF!	8.07929	#REF!	0.441	2.35065	7.55023	#REF!	1.47206	3.46541	1.85005	3.49311	#REF!	3	4.5
1998Q4	0.888488	#REF!	8.0613	#REF!	0.4415	2.35853	7.55328	#REF!	1.47503	3.46772	1.84856	3.4944	#REF!	2.97772	4.75
1999Q1	0.89993	#REF!	8.04253	#REF!	0.442	2.36627	7.5563	#REF!	1.4817	3.47002	1.84707	3.49568	#REF!	2.95424	5
1999Q2	0.903673	#REF!	8.05317	#REF!	0.4615	2.36439	7.54407	#REF!	1.49243	3.47332	1.84735	3.49422	#REF!	2.96023	5
1999Q3	0.907384	#REF!	8.06354	#REF!	0.481	2.36251	7.53148	#REF!	1.50457	3.47659	1.84762	3.49276	#REF!	2.96614	5
1999Q4	0.911064	#REF!	8.07368	#REF!	0.5005	2.36062	7.51851	#REF!	1.51503	3.47984	1.8479	3.49129	#REF!	2.97197	5
2000Q1	0.914713	#REF!	8.08358	#REF!	0.52	2.35873	7.50515	#REF!	1.52098	3.48307	1.84818	3.48982	#REF!	2.97772	5
2000Q2	0.917873	#REF!	8.08806	#REF!	0.5125	2.33748	7.51521	#REF!	1.52049	3.48869	1.84896	3.49227	#REF!	2.96379	5
2000Q3	0.92101	#REF!	8.09249	#REF!	0.505	2.31514	7.52504	#REF!	1.51475	3.49423	1.84974	3.49471	#REF!	2.94939	5
2000Q4	0.924124	#REF!	8.09688	#REF!	0.4975	2.29159	7.53466	#REF!	1.50568	3.49971	1.85052	3.49714	#REF!	2.9345	5
2001Q1	0.927216	#REF!	8.10122	#REF!	0.49	2.26669	7.54407	#REF!	1.49524	3.50512	1.85129	3.49955	#REF!	2.91908	5
2001Q2	0.928639	#REF!	8.13236	#REF!	0.48425	2.28943	7.55328	#REF!	1.48545	3.50363	1.85046	3.4986	#REF!	2.95303	4.75
2001Q3	0.930057	#REF!	8.16141	#REF!	0.4785	2.31104	7.56229	#REF!	1.47824	3.50213	1.84963	3.49766	#REF!	2.98453	4.5
2001Q4	0.931471	#REF!	8.18865	#REF!	0.47275	2.33162	7.57113	#REF!	1.47554	3.50063	1.84879	3.4967	#REF!	3.01389	4.25
2002Q1	0.932879	#REF!	8.21427	#REF!	0.467	2.35127	7.57978	#REF!	1.47922	3.49912	1.84795	3.49575	#REF!	3.04139	4
2002Q2	0.933285	#REF!	8.30691	#REF!	0.46075	2.36358	7.58546	#REF!	1.48996	3.49374	1.84921	3.49574	#REF!	3.05115	4
2002Q3	0.93369	#REF!	8.38322	#REF!	0.4545	2.37555	7.59106	#REF!	1.50465	3.4883	1.85047	3.49572	#REF!	3.0607	4
2002Q4	0.934094	#REF!	8.4481	#REF!	0.44825	2.3872	7.5966	#REF!	1.51956	3.48278	1.85173	3.4957	#REF!	3.07004	4
2003Q1	0.934498	#REF!	8.50454	#REF!	0.442	2.39854	7.60206	#REF!	1.5314	3.4772	1.85298	3.49568	#REF!	3.07918	4
2003Q2	0.934953	#REF!	8.50048	#REF!	0.4365	2.4065	7.61013	#REF!	1.53814	3.48835	1.85718	3.50471	#REF!	3.0607	4
2003Q3	0.935406	#REF!	8.49638	#REF!	0.431	2.41432	7.61805	#REF!	1.54151	3.49923	1.86134	3.51355	#REF!	3.04139	4
2003Q4	0.93586	#REF!	8.49224	#REF!	0.4255	2.422	7.62583	#REF!	1.54402	3.50984	1.86547	3.52222	#REF!	3.02119	4
2004Q1	0.936313	#REF!	8.48806	#REF!	0.42	2.42954	7.63347	#REF!	1.54807	3.5202	1.86955	3.53071	#REF!	3	4
2004Q2	0.93669	#REF!	8.50777	#REF!	0.41425	2.44343	7.64098	#REF!	1.55541	3.5296	1.87151	3.5281	#REF!	2.99454	3.25
2004Q3	0.937066	#REF!	8.52662	#REF!	0.4085	2.45689	7.64836	#REF!	1.56544	3.5388	1.87347	3.52547	#REF!	2.989	2.5
2004Q4	0.937443	#REF!	8.54468	#REF!	0.40275	2.46994	7.65562	#REF!	1.57698	3.54781	1.87542	3.52282	#REF!	2.9834	1.75
2005Q1	0.937819	#REF!	8.56203	#REF!	0.397	2.48262	7.66276	#REF!	1.58897	3.55664	1.87736	3.52016	#REF!	2.97772	1
2005Q2	0.938232	#REF!	8.55149	#REF!	0.394	2.501	7.66745	#REF!	1.60064	3.56508	1.87895	3.52112	#REF!	2.9834	1.25
2005Q3	0.938645	#REF!	8.54068	#REF!	0.391	2.51865	7.6721	#REF!	1.6122	3.57336	1.88053	3.52209	#REF!	2.989	1.5
2005Q4	0.939057	#REF!	8.5296	#REF!	0.388	2.5356	7.67669	#REF!	1.62402	3.58149	1.88211	3.52305	#REF!	2.99454	1.75
2006Q1	0.939469	#REF!	8.51823	#REF!	0.385	2.55191	7.68124	#REF!	1.63644	3.58946	1.88368	3.52401	#REF!	3	2
2006Q2	0.942789	#REF!	8.55149	#REF!	0.38175	2.58824	7.68797	#REF!	1.64991	3.59859	1.88882	3.52624	#REF!	3.01284	2.25
2006Q3	0.946084	#REF!	8.58238	#REF!	0.3785	2.62177	7.69461	#REF!	1.66533	3.60753	1.89391	3.52847	#REF!	3.02531	2.5
2006Q4	0.949353	#REF!	8.61123	#REF!	0.37525	2.65289	7.70114	#REF!	1.68361	3.6163	1.89893	3.53068	#REF!	3.03743	2.75
2007Q1	0.952599	#REF!	8.63827	#REF!	0.372	2.68193	7.70757	#REF!	1.70545	3.62488	1.9039	3.53288	#REF!	3.04922	3
2007Q2	0.960209	#REF!	8.68198	#REF!	0.368	2.72745	7.71391	#REF!	1.73103	3.63336	1.9102	3.53817	#REF!	3.03242	3.5
2007Q3	0.967688	#REF!	8.72168	#REF!	0.364	2.76864	7.72016	#REF!	1.75941	3.64167	1.91641	3.54339	#REF!	3.01494	4
2007Q4	0.975041	#REF!	8.75806	#REF!	0.36	2.80627	7.72632	#REF!	1.78951	3.64982	1.92253	3.54854	#REF!	2.99673	4.5
2008Q1	0.982271	#REF!	8.79162	#REF!	0.356	2.84089	7.73239	#REF!	1.82043	3.65782	1.92857	3.55364	#REF!	2.97772	5
2008Q2	1.00623	#REF!	8.77856	#REF!	0.35125	2.83499	7.73838	#REF!	1.85098	3.66425	1.9278	3.55431	#REF!	2.97197	5
2008Q3	1.02894	#REF!	8.7651	#REF!	0.3465	2.82901	7.74429	#REF!	1.87844	3.67058	1.92704	3.55497	#REF!	2.96614	5
2008Q4	1.05052	#REF!	8.7512	#REF!	0.34175	2.82294	7.75012	#REF!	1.90028	3.67681	1.92628	3.55564	#REF!	2.96023	5
2009Q1	1.07107	#REF!	8.73685	#REF!	0.337	2.81679	7.75587	#REF!	1.91437	3.68297	1.92551	3.5563	#REF!	2.95424	5
2009Q2	1.09468	#REF!	8.74079	#REF!	0.333	2.83351	7.76155	#REF!	1.91975	3.69328	1.94537	3.55606	#REF!	2.96023	5
2009Q3	1.11707	#REF!	8.74469	#REF!	0.329	2.84961	7.76716	#REF!	1.91978	3.70336	1.96435	3.55582	#REF!	2.96614	5
2009Q4	1.13837	#REF!	8.74856	#REF!	0.325	2.86513	7.77269	#REF!	1.91867	3.71321	1.98254	3.55558	#REF!	2.97197	5
2010Q1	1.15866	#REF!	8.75239	#REF!	0.321	2.88012	7.77815	#REF!	1.92059	3.72284	2	3.55534	#REF!	2.97772	5
2010Q2	1.17702	#REF!	8.75416	#REF!	0.3175	2.92398	7.78176	#REF!	1.92911	3.73174	2.00584	3.55889	#REF!	2.95904	4.75
2010Q3	1.19464	#REF!	8.75591	#REF!	0.314	2.96381	7.78533	#REF!	1.94524	3.74047	2.01159	3.56241	#REF!	2.93952	4.5
2010Q4	1.21157	#REF!	8.75766	#REF!	0.3105	3.00029	7.78888	#REF!	1.96901	3.74902	2.01728	3.56591	#REF!	2.91908	4.25
2011Q1	1.22786	#REF!	8.7594	#REF!	0.307	3.03394	7.79239	#REF!	2	3.75741	2.02289	3.56937	#REF!	2.89763	4
2011Q2	1.23298	#REF!	8.75409	#REF!	0.3025	3.04774	7.79934	#REF!	2.03635	3.76369	2.02575	3.5667	#REF!	2.9058	4
2011Q3	1.23803	#REF!	8.74871	#REF!	0.298	3.06111	7.80618	#REF!	2.07249	3.76988	2.02859	3.56401	#REF!	2.91381	4
2011Q4	1.24303	#REF!	8.74327	#REF!	0.2935	3.07409	7.81291	#REF!	2.10348	3.77599	2.03141	3.56131	#REF!	2.92169	4
2012Q1	1.24797	#REF!	8.73775	#REF!	0.289	3.08668	7.81954	#REF!	2.12562	3.78201	2.03422	3.55859	#REF!	2.92942	4
2012Q2	1.25358	#REF!	8.73826	#REF!	0.2835	3.09304	7.82607	#REF!	2.13713	3.79033	2.03706	3.5647	#REF!	2.94817	4.25
2012Q3	1.25912	#REF!	8.73877	#REF!	0.278	3.0993	7.83251	#REF!	2.14156	3.79849	2.03988	3.57072	#REF!	2.96614	4.5
2012Q4	1.26458	#REF!	8.73928	#REF!	0.2725	3.10548	7.83885	#REF!	2.14327	3.8065	2.04269	3.57666	#REF!	2.9834	4.75
2013Q1	1.26998	#REF!	8.73979	#REF!	0.267	3.11157	7.8451	#REF!	2.1464	3.81437	2.04548	3.58252	#REF!	3	5
2013Q2	1.27558	#REF!	8.74763	#REF!	0.2615	3.11953	7.85126	#REF!	2.15403	3.82238	2.04765	3.58444	#REF!	3.02531	5
2013Q3	1.2811	#REF!	8.75533	#REF!	0.256	3.12735	7.85733	#REF!	2.16528	3.83025	2.0498	3.58636	#REF!	3.04922	5
2013Q4	1.28656	#REF!	8.7629	#REF!	0.2505	3.13503	7.86332	#REF!	2.17836	3.83798	2.05195	3.58827	#REF!	3.07188	5
2014Q1	1.29195	#REF!	8.77034	#REF!	0.245	3.14257	7.86923	#REF!	2.19165	3.84558	2.05408	3.59017	#REF!	3.09342	5
2014Q2	1.2974	#REF!	8.76166	#REF!	0.2405	3.15456	7.87361	#REF!	2.20397	3.85378	2.05564	3.59148	#REF!	3.02325	5
2014Q3	1.3028	#REF!	8.75281	#REF!	0.236	3.16623	7.87795	#REF!	2.21533	3.86182	2.05719	3.59279	#REF!	2.93952	5
2014Q4	1.30812	#REF!	8.74377	#REF!	0.2315	3.1776	7.88224	#REF!	2.22604	3.86972	2.05874	3.59409	#REF!	2.83569	5
2015Q1	1.31338	#REF!	8.73453	#REF!	0.227	3.18868	7.88649	#REF!	2.23633	3.87748	2.06028	3.59539	#REF!	2.69897	5
2015Q2	1.31942	#REF!	8.73534	#REF!	0.22375	3.19662	7.8907	#REF!	2.24642	3.88277	2.06245	3.59616	#REF!	2.79588	4.75
2015Q3	1.32538	#REF!	8.73615	#REF!	0.2205	3.20442	7.89487	#REF!	2.25632	3.888	2.0646	3.59693	#REF!	2.87506	4.5
2015Q4	1.33126	#REF!	8.73695	#REF!	0.21725	3.21208	7.899	#REF!	2.26604	3.89317	2.06675	3.5977	#REF!	2.94201	4.25
2016Q1	1.33706	#REF!	8.73775	#REF!	0.214	3.21961	7.90309	#REF!	2.27555	3.89827	2.06888	3.59846	#REF!	3	4
2016Q2	1.34757	#REF!	8.73826	#REF!	0.212	3.23873	7.90849	#REF!	2.28486	3.90251	2.06963	3.60138	#REF!	3.01072	3.75
2016Q3	1.35784	#REF!	8.73877	#REF!	0.21	3.25704	7.91381	#REF!	2.29398	3.90671	2.07038	3.60428	#REF!	3.02119	3.5
2016Q4	1.36787	#REF!	8.73928	#REF!	0.208	3.27461	7.91908	#REF!	2.30291	3.91086	2.07113	3.60716	#REF!	3.03141	3.25
2017Q1	1.37767	#REF!	8.73979	#REF!	0.206	3.29149	7.92428	#REF!	2.31166	3.91498	2.07188	3.61002	#REF!	3.04139	3
2017Q2	1.39349	#REF!	8.74763	#REF!	0.2045	3.30611	7.92814	#REF!	2.32024	3.91935	2.0728	3.61071	#REF!	3.05115	3
2017Q3	1.40875	#REF!	8.75533	#REF!	0.203	3.32026	7.93197	#REF!	2.32865	3.92368	2.07372	3.6114	#REF!	3.0607	3
2017Q4	1.42349	#REF!	8.7629	#REF!	0.2015	3.33396	7.93576	#REF!	2.33691	3.92797	2.07463	3.61209	#REF!	3.07004	3
2018Q1	1.43775	#REF!	8.77034	#REF!	0.2	3.34724	7.93952	#REF!	2.345	3.93222	2.07555	3.61278	#REF!	3.07918	3
2018Q2	1.44793	#REF!	8.76166	#REF!	0.225	3.37152	7.92814	#REF!	2.35295	3.93503	2.07737	3.61411	#REF!	3.07918	3
2018Q3	1.45788	#REF!	8.75281	#REF!	0.25	3.39451	7.91645	#REF!	2.36076	3.93782	2.07918	3.61542	#REF!	3.07918	3
2018Q4	1.46761	#REF!	8.74377	#REF!	0.275	3.41634	7.90445	#REF!	2.36843	3.94059	2.08099	3.61674	#REF!	3.07918	3
2019Q1	1.47712	#REF!	8.73453	#REF!	0.3	3.43713	7.89209	#REF!	2.37596	3.94335	2.08279	3.61805	#REF!	3.07918	3
2019Q2	1.47712	#REF!	8.73453	#REF!	0.3	3.43713	7.89209	#REF!	2.38337	3.94335	2.08279	3.61805	#REF!	3.07918	3
2019Q3	1.47712	#REF!	8.73453	#REF!	0.3	3.43713	7.89209	#REF!	2.39066	3.94335	2.08279	3.61805	#REF!	3.07918	3
2019Q4	1.47712	#REF!	8.73453	#REF!	0.3	3.43713	7.89209	#REF!	2.39782	3.94335	2.08279	3.61805	#REF!	3.07918	3

## Sheet: final food research data 2022
			Data for publication
log(nsp) log(pf) log(y) log(e) log(fsp) log(Pnf) log(Aid) log(Ip) pins log(w) 1988q1 2018q4 L1=0.35 m=1
t	e	fimp	Aid	findex	nsp	Pf	fsp	g	Pnf	Y	IP	tech	RGDP	W	Pins
1988Q1	2.07	16.2	192566700	45	0.539	106.99	21000000	4900000000	14.9871	3353.35	28.9315	2641	150672779000	870	3
1988Q2	2.07	16.2902	173632275	45.5	0.53925	108.862	21000000	5100000000	15.1964	3322.87	30.2512	2678.5	150536780175	902.5	3
1988Q3	2.07	16.3804	154697850	46	0.5395	110.735	21000000	5300000000	15.4056	3292.39	31.5709	2716	150400781350	935	3
1988Q4	2.07	16.4706	135763425	46.5	0.53975	112.608	21000000	5500000000	15.6149	3261.91	32.8906	2753.5	150264782525	967.5	3
1989Q1	2.07	16.5608	116829000	47	0.54	114.48	21000000	5700000000	15.8241	3231.43	34.2103	2791	150128783700	1000	3
1989Q2	2.07	16.5664	129402225	47.5	0.5425	117.127	21250000	5575000000	15.9535	3225.37	34.4713	2818.38	151152080925	1050	2.75
1989Q3	2.07	16.5719	141975450	48	0.545	119.775	21500000	5450000000	16.0829	3219.3	34.7324	2845.75	152175378150	1100	2.5
1989Q4	2.07	16.5775	154548675	48.5	0.5475	122.422	21750000	5325000000	16.2124	3213.24	34.9934	2873.12	153198675375	1150	2.25
1990Q1	2.07	16.583	167121900	49	0.55	125.07	22000000	5200000000	16.3418	3207.18	35.2545	2900.5	154221972600	1200	2
1990Q2	2.07	16.5692	167613300	49.25	0.54	136.013	22500000	5125000000	17.1214	3124.03	35.5679	2899.88	151470082100	1112.5	1.75
1990Q3	2.07	16.5554	168104700	49.5	0.53	146.957	23000000	5050000000	17.9011	3040.88	35.8814	2899.25	148718191600	1025	1.5
1990Q4	2.07	16.5416	168596100	49.75	0.52	157.9	23500000	4975000000	18.6808	2957.73	36.1949	2898.62	145966301100	937.5	1.25
1991Q1	2.07	16.5278	169087500	50	0.51	168.844	24000000	4900000000	19.4605	2874.57	36.5084	2898	143214410600	850	1
1991Q2	2.25325	16.4852	177311700	50	0.505	173.593	24500000	4725000000	20.2161	2789.04	37.0883	2876.75	140109350275	887.5	2
1991Q3	2.4365	16.4426	185535900	50	0.5	178.342	25000000	4550000000	20.9718	2703.5	37.6682	2855.5	137004289950	925	3
1991Q4	2.61975	16.4001	193760100	50	0.495	183.091	25500000	4375000000	21.7275	2617.96	38.2482	2834.25	133899229625	962.5	4
1992Q1	2.803	16.3575	201984300	50	0.49	187.84	26000000	4200000000	22.4831	2532.43	38.8281	2813	130794169300	1000	5
1992Q2	3.35225	16.2777	187845750	50.455	0.48375	191.409	26750000	4450000000	23.235	2590.41	40.2463	2799.25	135091684425	1125	5
1992Q3	3.9015	16.1979	173707200	50.91	0.4775	194.977	27500000	4700000000	23.9869	2648.39	41.6645	2785.5	139389199550	1250	5
1992Q4	4.45075	16.1181	159568650	51.365	0.47125	198.546	28250000	4950000000	24.7388	2706.37	43.0827	2771.75	143686714675	1375	5
1993Q1	5	16.0383	145430100	51.82	0.465	202.115	29000000	5200000000	25.4907	2764.36	44.5009	2758	147984229800	1500	5
1993Q2	5.11625	16.1922	159638850	51.8125	0.464025	205.955	29250000	5650000000	25.6774	2761.98	47.1996	2778.75	149164390925	1362.5	4.75
1993Q3	5.2325	16.3462	173847600	51.805	0.46305	209.795	29500000	6100000000	25.8642	2759.61	49.8983	2799.5	150344552050	1225	4.5
1993Q4	5.34875	16.5001	188056350	51.7975	0.462075	213.635	29750000	6550000000	26.051	2757.23	52.597	2820.25	151524713175	1087.5	4.25
1994Q1	5.465	16.6541	202265100	51.79	0.4611	217.475	30000000	7000000000	26.2378	2754.86	55.2956	2841	152704874300	950	4
1994Q2	5.63825	15.9493	192620025	53.2275	0.459575	223.564	30250000	7325000000	27.0713	2773.1	57.6166	2828.75	155044126450	1060	4.25
1994Q3	5.8115	15.2446	182974950	54.665	0.45805	229.653	30500000	7650000000	27.9047	2791.34	59.9376	2816.5	157383378600	1170	4.5
1994Q4	5.98475	14.5398	173329875	56.1025	0.456525	235.741	30750000	7975000000	28.7382	2809.58	62.2585	2804.25	159722630750	1280	4.75
1995Q1	6.158	13.835	163684800	57.54	0.455	241.83	31000000	8.3e+09	29.5717	2827.82	64.5795	2792	162061882900	1390	5
1995Q2	6.2065	11.7575	156555450	59.9225	0.45375	232.623	31500000	8775000000	29.5894	2890.87	65.9216	2836.62	167096405700	1275	4.75
1995Q3	6.255	9.67993	149426100	62.305	0.4525	223.415	32000000	9250000000	29.607	2953.93	67.2637	2881.25	172130928500	1160	4.5
1995Q4	6.3035	7.60239	142296750	64.6875	0.45125	214.208	32500000	9725000000	29.6247	3016.98	68.6058	2925.88	177165451300	1045	4.25
1996Q1	6.352	5.52485	135167400	67.07	0.45	205	33000000	10200000000	29.6424	3080.04	69.9479	2970.5	182199974100	930	4
1996Q2	6.439	4.75198	129379275	67.2975	0.4505	208.792	33000000	10150000000	29.6577	3080.45	70.4352	2982.62	183627468475	922.5	4.25
1996Q3	6.526	3.97911	123591150	67.525	0.451	212.585	33000000	10100000000	29.673	3080.86	70.9226	2994.75	185054962850	915	4.5
1996Q4	6.613	3.20624	117803025	67.7525	0.4515	216.377	33000000	10050000000	29.6883	3081.27	71.41	3006.88	186482457225	907.5	4.75
1997Q1	6.7	2.43337	112014900	67.98	0.452	220.17	33000000	10000000000	29.7037	3081.68	71.8974	3019	187909951600	900	5
1997Q2	6.804	3.33854	116453700	66.715	0.449	219.127	33500000	10330000000	29.6925	3033.51	71.7447	3037.75	186285404700	950	4.75
1997Q3	6.908	4.24371	120892500	65.45	0.446	218.085	34000000	10660000000	29.6814	2985.34	71.592	3056.5	184660857800	1000	4.5
1997Q4	7.012	5.14888	125331300	64.185	0.443	217.042	34500000	10990000000	29.6702	2937.16	71.4393	3075.25	183036310900	1050	4.25
1998Q1	7.116	6.05406	129770100	62.92	0.44	216	35000000	11320000000	29.6591	2888.99	71.2866	3094	181411764000	1100	4
1998Q2	7.3225	6.88464	124899975	64.13	0.4405	220.104	35250000	12365000000	29.8239	2904.59	71.0445	3103.25	183752948950	1050	4.25
1998Q3	7.529	7.71523	120029850	65.34	0.441	224.208	35500000	13410000000	29.9887	2920.18	70.8024	3112.5	186094133900	1000	4.5
1998Q4	7.7355	8.54582	115159725	66.55	0.4415	228.312	35750000	14455000000	30.1535	2935.77	70.5603	3121.75	188435318850	950	4.75
1999Q1	7.942	9.3764	110289600	67.76	0.442	232.416	36000000	15500000000	30.3183	2951.37	70.3182	3131	190776503800	900	5
1999Q2	8.01075	8.77956	113022675	68.2875	0.4615	231.416	35000000	15925000000	31.0357	2973.86	70.3633	3120.5	193673071800	912.5	5
1999Q3	8.0795	8.18271	115755750	68.815	0.481	230.416	34000000	1.635e+10	31.7531	2996.35	70.4083	3110	196569639800	925	5
1999Q4	8.14825	7.58586	118488825	69.3425	0.5005	229.416	33000000	1.6775e+10	32.4705	3018.85	70.4534	3099.5	199466207800	937.5	5
2000Q1	8.217	6.98902	121221900	69.87	0.52	228.416	32000000	17200000000	33.1878	3041.34	70.4985	3089	202362775800	950	5
2000Q2	8.277	8.87842	122478075	71.215	0.5125	217.511	32750000	1.6725e+10	32.7103	3080.96	70.6254	3106.5	206562464275	920	5
2000Q3	8.337	10.7678	123734250	72.56	0.505	206.606	33500000	16250000000	32.2328	3120.57	70.7523	3124	210762152750	890	5
2000Q4	8.397	12.6572	124990425	73.905	0.4975	195.701	34250000	15775000000	31.7553	3160.19	70.8791	3141.5	214961841225	860	5
2001Q1	8.457	14.5466	126246600	75.25	0.49	184.796	35000000	15300000000	31.2778	3199.8	71.006	3159	219161529700	830	5
2001Q2	8.48475	13.7357	135631125	77.6475	0.48425	194.728	35750000	15650000000	30.9946	3188.82	70.8699	3152.12	219991453700	897.5	4.75
2001Q3	8.5125	12.9247	145015650	80.045	0.4785	204.661	36500000	16000000000	30.7114	3177.84	70.7338	3145.25	220821377700	965	4.5
2001Q4	8.54025	12.1138	154400175	82.4425	0.47275	214.594	37250000	1.635e+10	30.4282	3166.87	70.5977	3138.38	221651301700	1032.5	4.25
2002Q1	8.568	11.3029	163784700	84.84	0.467	224.526	38000000	16700000000	30.1451	3155.89	70.4616	3131.5	222481225700	1100	4
2002Q2	8.576	13.8459	202726125	85.5	0.46075	230.981	38500000	17487500000	31.1073	3117.04	70.6667	3131.38	221279070800	1125	4
2002Q3	8.584	16.3889	241667550	86.16	0.4545	237.436	39000000	18275000000	32.0695	3078.2	70.8718	3131.25	220076915900	1150	4
2002Q4	8.592	18.9319	280608975	86.82	0.44825	243.891	39500000	19062500000	33.0318	3039.36	71.077	3131.12	218874761000	1175	4
2003Q1	8.6	21.4749	319550400	87.48	0.442	250.346	40000000	19850000000	33.994	3000.51	71.2821	3131	217672606100	1200	4
2003Q2	8.609	19.1805	316576350	88.7625	0.4365	254.977	40750000	19937500000	34.3264	3078.59	71.9751	3196.75	225058565850	1150	4
2003Q3	8.618	16.8861	313602300	90.045	0.431	259.608	41500000	20025000000	34.6588	3156.66	72.6681	3262.5	232444525600	1100	4
2003Q4	8.627	14.5917	310628250	91.3275	0.4255	264.24	42250000	20112500000	34.9912	3234.74	73.3611	3328.25	239830485350	1050	4
2004Q1	8.636	12.2974	307654200	92.61	0.42	268.871	43000000	20200000000	35.3236	3312.81	74.0541	3394	247216445100	1000	4
2004Q2	8.6435	11.8843	321935175	95.12	0.41425	277.608	43750000	21275000000	36.1957	3385.31	74.39	3373.62	254520928350	987.5	3.25
2004Q3	8.651	11.4712	336216150	97.63	0.4085	286.346	44500000	22350000000	37.0678	3457.82	74.7258	3353.25	261825411600	975	2.5
2004Q4	8.6585	11.058	350497125	100.14	0.40275	295.083	45250000	23425000000	37.9399	3530.32	75.0616	3332.88	269129894850	962.5	1.75
2005Q1	8.666	10.6449	364778100	102.65	0.397	303.82	46000000	24500000000	38.812	3602.83	75.3975	3312.5	276434378100	950	1
2005Q2	8.67425	10.106	356028750	103.172	0.394	316.96	46500000	25675000000	39.9329	3673.53	75.6738	3319.88	283922105700	962.5	1.25
2005Q3	8.6825	9.56709	347279400	103.695	0.391	330.101	47000000	26850000000	41.0538	3744.23	75.9502	3327.25	291409833300	975	1.5
2005Q4	8.69075	9.02817	338530050	104.218	0.388	343.241	47500000	28025000000	42.1748	3814.94	76.2265	3334.62	298897560900	987.5	1.75
2006Q1	8.699	8.48924	329780700	104.74	0.385	356.381	48000000	29200000000	43.2957	3885.64	76.5029	3342	306385288500	1000	2
2006Q2	8.76575	8.12006	356031450	105.32	0.38175	387.475	48750000	30775000000	45.1596	3968.19	77.4146	3359.25	315160291075	1030	2.25
2006Q3	8.8325	7.75088	382282200	105.9	0.3785	418.569	49500000	32350000000	47.0236	4050.74	78.3264	3376.5	323935293650	1060	2.5
2006Q4	8.89925	7.3817	408532950	106.48	0.37525	449.663	50250000	3.3925e+10	48.8875	4133.29	79.2382	3393.75	332710296225	1090	2.75
2007Q1	8.966	7.01252	434783700	107.06	0.372	480.757	51000000	35500000000	50.7515	4215.85	80.1499	3411	341485298800	1120	3
2007Q2	9.1245	8.83902	480812625	109.043	0.368	533.882	51750000	38375000000	54.5974	4298.89	81.3207	3452.75	350695602675	1077.5	3.5
2007Q3	9.283	10.6655	526841550	111.025	0.364	587.007	52500000	41250000000	58.4433	4381.93	82.4915	3494.5	359905906550	1035	4
2007Q4	9.4415	12.492	572870475	113.007	0.36	640.132	53250000	44125000000	62.2892	4464.98	83.6623	3536.25	369116210425	992.5	4.5
2008Q1	9.6	14.3185	618899400	114.99	0.356	693.257	54000000	47000000000	66.1351	4548.02	84.8331	3578	378326514300	950	5
2008Q2	10.1445	13.454	600566400	116.743	0.35125	683.899	54750000	49675000000	70.1274	4615.79	84.6845	3583.5	386652112475	937.5	5
2008Q3	10.689	12.5895	582233400	118.495	0.3465	674.542	55500000	52350000000	74.1197	4683.56	84.5359	3589	394977710650	925	5
2008Q4	11.2335	11.7249	563900400	120.248	0.34175	665.184	56250000	55025000000	78.112	4751.32	84.3873	3594.5	403303308825	912.5	5
2009Q1	11.778	10.8604	545567400	122	0.337	655.827	57000000	57700000000	82.1043	4819.09	84.2387	3600	411628907000	900	5
2009Q2	12.436	10.8879	550538100	125.882	0.333	681.568	57750000	61100000000	82.4008	4934.95	88.179	3598	424544317950	912.5	5
2009Q3	13.094	10.9155	555508800	129.765	0.329	707.309	58500000	64500000000	82.6974	5050.8	92.1194	3596	437459728900	925	5
2009Q4	13.752	10.943	560479500	133.648	0.325	733.05	59250000	6.79e+10	82.9939	5166.66	96.0597	3594	450375139850	937.5	5
2010Q1	14.41	10.9705	565450200	137.53	0.321	758.791	60000000	71300000000	83.2904	5282.51	100	3592	463290550800	950	5
2010Q2	15.0322	11.9255	567750600	137.792	0.3175	839.416	60500000	76925000000	87.4678	5391.92	101.353	3621.5	476237548350	910	4.75
2010Q3	15.6545	12.8804	570051000	138.055	0.314	920.041	61000000	82550000000	91.6452	5501.32	102.705	3651	489184545900	870	4.5
2010Q4	16.2767	13.8353	572351400	138.317	0.3105	1000.67	61500000	88175000000	95.8226	5610.72	104.058	3680.5	502131543450	830	4.25
2011Q1	16.899	14.7902	574651800	138.58	0.307	1081.29	62000000	93800000000	100	5720.12	105.411	3710	515078541000	790	4
2011Q2	17.0993	13.6585	567665550	140.708	0.3025	1116.2	63000000	103725000000	108.385	5803.5	106.107	3687.25	526214296500	805	4
2011Q3	17.2995	12.5267	560679300	142.835	0.298	1151.1	64000000	113650000000	116.771	5886.87	106.804	3664.5	537350052000	820	4
2011Q4	17.4997	11.3949	553693050	144.963	0.2935	1186.01	65000000	123575000000	125.156	5970.24	107.5	3641.75	548485807500	835	4
2012Q1	17.7	10.2631	546706800	147.09	0.289	1220.91	66000000	133500000000	133.541	6053.62	108.197	3619	559621563000	850	4
2012Q2	17.93	10.7152	547347375	147.887	0.2835	1238.91	67000000	144375000000	135.178	6170.67	108.908	3670.25	574426729250	887.5	4.25
2012Q3	18.16	11.1672	547987950	148.685	0.278	1256.91	68000000	155250000000	136.814	6287.73	109.619	3721.5	589231895500	925	4.5
2012Q4	18.39	11.6192	548628525	149.482	0.2725	1274.91	69000000	166125000000	138.451	6404.78	110.33	3772.75	604037061750	962.5	4.75
2013Q1	18.62	12.0712	549269100	150.28	0.267	1292.91	70000000	177000000000	140.088	6521.84	111.04	3824	618842228000	1000	5
2013Q2	18.8615	12.0712	559278675	152.1	0.2615	1316.83	71000000	184925000000	143.934	6643.31	111.596	3841	634711652500	1060	5
2013Q3	19.103	12.0712	569288250	153.92	0.256	1340.75	72000000	192850000000	147.78	6764.78	112.151	3858	650581077000	1120	5
2013Q4	19.3445	12.0712	579297825	155.74	0.2505	1364.66	73000000	2.00775e+11	151.626	6886.26	112.706	3875	666450501500	1180	5
2014Q1	19.586	12.0712	589307400	157.56	0.245	1388.58	74000000	208700000000	155.472	7007.73	113.262	3892	682319926000	1240	5
2014Q2	19.8337	12.0712	577647450	160.345	0.2405	1427.46	74750000	217850000000	159.684	7141.26	113.669	3903.75	700047387500	1055	5
2014Q3	20.0815	12.0712	565987500	163.13	0.236	1466.34	75500000	227000000000	163.896	7274.8	114.075	3915.5	717774849000	870	5
2014Q4	20.3292	12.0712	554327550	165.915	0.2315	1505.22	76250000	236150000000	168.108	7408.34	114.482	3927.25	735502310500	685	5
2015Q1	20.577	12.0712	542667600	168.7	0.227	1544.1	77000000	245300000000	172.319	7541.87	114.889	3939	753229772000	500	5
2015Q2	20.8652	12.0712	543677400	166.998	0.22375	1572.6	77750000	2.5635e+11	176.391	7634.34	115.464	3946	767469141500	625	4.75
2015Q3	21.1535	12.0712	544687200	165.295	0.2205	1601.1	78500000	2.674e+11	180.462	7726.81	116.038	3953	781708511000	750	4.5
2015Q4	21.4417	12.0712	545697000	163.593	0.21725	1629.6	79250000	278450000000	184.533	7819.27	116.613	3960	795947880500	875	4.25
2016Q1	21.73	12.0712	546706800	161.89	0.214	1658.1	80000000	289500000000	188.604	7911.74	117.187	3967	810187250000	1000	4
2016Q2	22.2625	12.0712	547347375	163.917	0.212	1732.71	81000000	300250000000	188.604	7989.3	117.39	3993.75	830795437500	1025	3.75
2016Q3	22.795	12.0712	547987950	165.945	0.21	1807.33	82000000	311000000000	188.604	8066.87	117.594	4020.5	851403625000	1050	3.5
2016Q4	23.3275	12.0712	548628525	167.972	0.208	1881.94	83000000	321750000000	188.604	8144.43	117.797	4047.25	872011812500	1075	3.25
2017Q1	23.86	12.0712	549269100	170	0.206	1956.55	84000000	332500000000	188.604	8222	118	4074	892620000000	1100	3
2017Q2	24.745	12.0712	559278675	171.25	0.2045	2023.55	84750000	332500000000	188.604	8305.25	118.25	4080.5	909802935000	1125	3
2017Q3	25.63	12.0712	569288250	172.5	0.203	2090.55	85500000	332500000000	188.604	8388.5	118.5	4087	926985870000	1150	3
2017Q4	26.515	12.0712	579297825	173.75	0.2015	2157.55	86250000	332500000000	188.604	8471.75	118.75	4093.5	944168805000	1175	3
2018Q1	27.4	12.0712	589307400	175	0.2	2224.55	87000000	332500000000	188.604	8555	119	4100	961351740000	1200	3
2018Q2	28.05	12.0712	577647450	176.25	0.225	2352.44	84750000	332500000000	188.604	8610.5	119.5	4112.5	982982154150	1200	3
2018Q3	28.7	12.0712	565987500	177.5	0.25	2480.32	82500000	332500000000	188.604	8666	120	4125	1004612568300	1200	3
2018Q4	29.35	12.0712	554327550	178.75	0.275	2608.21	80250000	332500000000	188.604	8721.5	120.5	4137.5	1026242982450	1200	3
2019Q1	30	12.0712	542667600	180	0.3	2736.1	78000000	332500000000	188.604	8777	121	4150	1047873396600	1200	3
2019Q2	30	12.0712	542667600	180	0.3	2736.1	78000000	332500000000	188.604	8777	121	4150	1047873396600	1200	3
2019Q3	30	12.0712	542667600	180	0.3	2736.1	78000000	332500000000	188.604	8777	121	4150	1047873396600	1200	3
2019Q4	30	12.0712	542667600	180	0.3	2736.1	78000000	332500000000	188.604	8777	121	4150	1047873396600	1200	3
